# Supplementary material for: Metallohelices that kill Gram-negative pathogens using intracellular antimicrobial peptide pathways
Source: Chem Sci. 2019 Sep 5;10(42):9708–20. doi: 10.1039/c9sc03532j (PMC6977464; doi:10.1039/c9sc03532j)
Supplement: Supplementary file 2 [file SC-010-C9SC03532J-s002.xlsx]

## Sheet: Description
This dataset contains the results of DESeq2 analysis on the levels of the transcripts of E. coli Sakai O157:H7 (Assembly: GCF_000008865.1) including plasmids pO157 and pOSAK1 (Accession numbers: NC_002695 for the chromosome, NC_002128 for pOSAK1 and NC_002127 for pO157)
Worksheet contents:
"All-genes"	The results of DESeq2 analysis for all the genes of E. coli Sakai O157:H7, comparing transcript levels in the presence of the compound compared to transcript levels in the absence of the compound.
"Up-regulated"	List of genes of E. coli Sakai O157:H7 significantly upregulated (Padj < 0.05) in the presence of the compound
"Down-regulated"	List of genes of E. coli Sakai O157:H7 significantly downregulated (Padj < 0.05) in the presence of the compound.
	Gene name and gene product are as per the Uniprot database.

## Sheet: All genes
Locus tag	Base Mean	log2 Fold change	lfcSE	stat	P value	Padj
ECp021.1n.gene	10.8925	-0.215783	0.339236	-0.636087	0.52472	NA
ECp023.gene	18.8318	-0.0250941	0.341255	-0.0735348	0.941381	NA
ECp025.2n.gene	179.063	-0.0257324	0.267981	-0.0960234	0.923502	0.998111
ECp042.gene	6.48877	-0.195837	0.327261	-0.598411	0.549566	NA
ECp054.gene	20.4135	-0.203144	0.339413	-0.598515	0.549496	NA
ECp070.gene	88.1324	-0.145323	0.286633	-0.507002	0.612154	0.980199
ECp072.gene	13.2121	0.351064	0.33965	1.03361	0.30132	NA
ECp088.2c.gene	141.429	-0.127345	0.277901	-0.458239	0.64678	0.980199
ECs0001	887.868	-0.0367631	0.254002	-0.144736	0.88492	0.993106
ECs0002	1404.29	0.287818	0.27214	1.05761	0.290233	0.958175
ECs0003	1214.99	0.0552453	0.246038	0.22454	0.822337	0.988497
ECs0004	1458.74	0.245342	0.243133	1.00909	0.312933	0.975854
ECs0005	45.6623	0.0970645	0.320587	0.302771	0.762064	0.983458
ECs0006	291.331	0.178491	0.263457	0.677498	0.49809	0.980199
ECs0007	345.627	0.0344269	0.261033	0.131887	0.895073	0.993106
ECs0008	10327.9	-0.0244986	0.238753	-0.102611	0.918272	0.99708
ECs0009	517.631	-0.199206	0.245245	-0.812271	0.416636	0.980199
ECs0010	138.323	0.114305	0.268718	0.425373	0.670565	0.982127
ECs0012	57.6545	-0.0108601	0.310685	-0.0349554	0.972115	0.999269
ECs0013	4.19513	-0.43778	0.29197	-1.4994	0.133769	NA
ECs0014	45775.3	0.495287	0.249152	1.98789	0.0468235	0.599027
ECs0015	4305.91	0.547343	0.23676	2.31181	0.0207882	0.412286
ECs0016	5579.1	-0.162656	0.265741	-0.612085	0.540482	0.980199
ECs0017	3927.15	-0.222196	0.249887	-0.889184	0.373904	0.980199
ECs0018	1358.58	-0.0377193	0.245986	-0.15334	0.878131	0.993106
ECs0019	3.47285	-0.137407	0.281238	-0.488578	0.62514	NA
ECs0021	1.67347	0.307285	0.20676	1.48619	0.137229	NA
ECs0022	18.4597	0.222622	0.340106	0.654567	0.512747	NA
ECs0023	1.87841	0.194025	0.222681	0.871318	0.383581	NA
ECs0024	3.24852	-0.0081444	0.277733	-0.0293245	0.976606	NA
ECs0025	7.79158	0.153485	0.32323	0.474848	0.634895	NA
ECs0026	813.615	0.077155	0.25508	0.302474	0.762291	0.983458
ECs0027	56.0435	-0.132809	0.301395	-0.440648	0.659468	0.980199
ECs0028	1098.29	0.237267	0.25406	0.933902	0.350354	0.980199
ECs0029	6354.84	-0.014139	0.236107	-0.0598838	0.952248	0.999269
ECs0030	663.775	-0.205838	0.252958	-0.813724	0.415803	0.980199
ECs0031	458.242	0.00332372	0.247652	0.0134209	0.989292	0.999269
ECs0032	705.887	0.2598	0.25009	1.03883	0.298886	0.962656
ECs0033	538.704	-0.0314008	0.250894	-0.125155	0.900401	0.993106
ECs0034	959.838	0.452475	0.269495	1.67898	0.0931567	0.751423
ECs0035	1343.61	0.5147	0.334979	1.53651	0.124412	0.807444
ECs0036	6535.38	-0.118735	0.249897	-0.475137	0.63469	0.980199
ECs0037	543.299	-0.54389	0.287755	-1.89012	0.0587425	0.648092
ECs0038	30.8854	0.237666	0.324284	0.732894	0.463623	0.980199
ECs0039	24.2849	-0.277541	0.333836	-0.831369	0.405765	0.980199
ECs0040	195.153	-0.18267	0.267536	-0.682786	0.494742	0.980199
ECs0041	171.948	-0.361174	0.286609	-1.26016	0.20761	0.887312
ECs0042	442.854	-0.239815	0.302677	-0.792313	0.428178	0.980199
ECs0043	15.0156	-0.0519649	0.341351	-0.152233	0.879003	NA
ECs0044	64.8781	0.0583499	0.297088	0.196406	0.844292	0.990306
ECs0045	91.3212	-0.0114795	0.285573	-0.0401982	0.967935	0.999269
ECs0046	39.6978	0.149619	0.322343	0.464162	0.642532	0.980199
ECs0047	5.55173	-0.266501	0.312592	-0.852555	0.393906	NA
ECs0048	138.718	-0.25741	0.278318	-0.924876	0.35503	0.980199
ECs0049	223.825	0.509738	0.26016	1.95933	0.0500747	0.610118
ECs0050	1380.25	0.203072	0.241276	0.841658	0.39998	0.980199
ECs0051	949.033	0.138203	0.243783	0.56691	0.570775	0.980199
ECs0052	652.406	-0.141435	0.26327	-0.537224	0.591113	0.980199
ECs0053	459.079	-0.506309	0.256625	-1.97296	0.0485007	0.608584
ECs0054	949.141	0.130326	0.246068	0.529635	0.596365	0.980199
ECs0055	1402.79	0.107415	0.248967	0.431444	0.666145	0.980381
ECs0056	1798.16	0.020448	0.24219	0.0844295	0.932715	0.999269
ECs0057	1964.14	0.00291263	0.234358	0.0124281	0.990084	0.999269
ECs0058	6412.83	-0.161687	0.242246	-0.667447	0.504486	0.980199
ECs0059	8575.72	0.113152	0.24099	0.46953	0.638691	0.980199
ECs0060	160.492	0.164195	0.265013	0.619574	0.535539	0.980199
ECs0061	205.899	-0.175306	0.27911	-0.628087	0.529947	0.980199
ECs0062	760.196	-0.232363	0.268041	-0.866895	0.386	0.980199
ECs0063	1823.93	-0.0165517	0.238146	-0.0695025	0.94459	0.999269
ECs0064	1413.79	0.157148	0.255825	0.61428	0.539031	0.980199
ECs0065	71.5162	0.215133	0.292108	0.736485	0.461435	0.980199
ECs0066	253.447	-0.136653	0.270251	-0.50565	0.613102	0.980199
ECs0067	146.976	0.184773	0.267239	0.691414	0.489305	0.980199
ECs0068	1073.57	-0.109142	0.261026	-0.418129	0.675853	0.982645
ECs0069	381.623	-0.0185046	0.25656	-0.0721259	0.942502	0.999269
ECs0070	375.282	-0.0834933	0.263969	-0.3163	0.751775	0.983458
ECs0071	463.57	0.174945	0.302841	0.57768	0.56348	0.980199
ECs0072	788.938	0.134329	0.315387	0.42592	0.670166	0.982127
ECs0073	528.976	-0.547422	0.248454	-2.20332	0.0275725	0.48623
ECs0074	245.178	-0.0273925	0.255102	-0.107379	0.914488	0.995896
ECs0075	364.679	-0.186089	0.268277	-0.693643	0.487906	0.980199
ECs0076	453.203	0.137213	0.252209	0.544044	0.586411	0.980199
ECs0077	201.286	0.254516	0.286357	0.888807	0.374107	0.980199
ECs0078	182.789	0.222938	0.28036	0.795184	0.426507	0.980199
ECs0079	53.4	0.139516	0.319653	0.43646	0.662503	0.980199
ECs0080	17.1434	0.260881	0.340597	0.765954	0.443704	NA
ECs0081	150.77	0.180362	0.275913	0.653692	0.513311	0.980199
ECs0082	97.6544	-0.127005	0.298302	-0.425759	0.670284	0.982127
ECs0084	1805.9	-0.307709	0.239807	-1.28315	0.199438	0.872107
ECs0085	1597.22	-0.0436464	0.239633	-0.182138	0.855474	0.991575
ECs0086	2305.1	-0.183646	0.236524	-0.776438	0.43749	0.980199
ECs0087	949.917	-0.102966	0.244831	-0.420561	0.674076	0.982639
ECs0088	7783.08	-0.0992031	0.25138	-0.394635	0.693113	0.982645
ECs0089	3042.02	-0.283925	0.248287	-1.14354	0.252815	0.92689
ECs0090	3199.47	-0.203674	0.236652	-0.860648	0.389432	0.980199
ECs0091	2036.33	-0.35874	0.254394	-1.41018	0.158487	0.844208
ECs0092	2846.07	-0.276377	0.255564	-1.08144	0.279502	0.955311
ECs0093	2177.99	-0.267333	0.24516	-1.09044	0.275518	0.950206
ECs0094	2223.79	-0.29639	0.246409	-1.20284	0.22904	0.908511
ECs0095	2764.19	-0.202859	0.242405	-0.83686	0.402671	0.980199
ECs0096	4126.38	-0.154813	0.239413	-0.646636	0.517867	0.980199
ECs0097	3335.5	-0.289494	0.253274	-1.14301	0.253035	0.92689
ECs0098	5142.2	-0.0867407	0.232428	-0.373193	0.709005	0.983458
ECs0099	13194.8	-0.193269	0.237657	-0.813229	0.416087	0.980199
ECs0100	12854.8	-0.0582748	0.253109	-0.230236	0.817908	0.987079
ECs0101	720.376	-0.162177	0.240592	-0.674073	0.500265	0.980199
ECs0102	5035.6	-0.0858407	0.246616	-0.348074	0.727785	0.983458
ECs0103	64.6176	-0.00852038	0.29536	-0.0288474	0.976986	0.999269
ECs0105	278.202	0.127283	0.281376	0.452361	0.651009	0.980199
ECs0106	508.961	0.247174	0.268104	0.921932	0.356564	0.980199
ECs0107	262.098	-0.0284379	0.27367	-0.103913	0.917238	0.996956
ECs0108	1387.98	0.353266	0.268164	1.31735	0.187721	0.859763
ECs0110	162.281	-0.0949144	0.264995	-0.358174	0.720213	0.983458
ECs0111	20.0504	-0.0643276	0.341484	-0.188377	0.850581	NA
ECs0112	4.10168	0.109401	0.289285	0.378176	0.7053	NA
ECs0113	428.488	0.178327	0.258773	0.689124	0.490745	0.980199
ECs0114	577.25	-0.0240837	0.242926	-0.0991402	0.921027	0.997707
ECs0115	817.074	0.169314	0.245096	0.690808	0.489686	0.980199
ECs0116	510.599	-0.110966	0.26326	-0.421508	0.673384	0.982639
ECs0117	383.066	0.291275	0.30621	0.951227	0.341489	0.980199
ECs0118	14682.6	-0.60432	0.242445	-2.49261	0.0126808	0.33582
ECs0119	9807.83	-0.675915	0.28005	-2.41356	0.0157977	0.372955
ECs0120	10528.8	-0.188249	0.261251	-0.72057	0.471174	0.980199
ECs0121	151.98	-0.187835	0.284481	-0.660273	0.509079	0.980199
ECs0122	19304.1	-0.0095661	0.262495	-0.036443	0.970929	0.999269
ECs0123	1810.56	-0.460861	0.277862	-1.6586	0.0971973	0.761881
ECs0124	1559.85	0.61705	0.317123	1.94578	0.0516815	0.614942
ECs0125	1838.78	0.547931	0.309965	1.76772	0.0771083	0.711915
ECs0126	116.425	-0.386215	0.282691	-1.36621	0.171873	0.853834
ECs0127	1671.92	0.0646159	0.247802	0.260756	0.794281	0.985586
ECs0128	2642.47	0.150098	0.252333	0.59484	0.551951	0.980199
ECs0129	399.538	0.155096	0.283872	0.54636	0.584818	0.980199
ECs0130	725.185	0.141917	0.28602	0.496178	0.619769	0.980199
ECs0131	309.053	0.337635	0.258691	1.30517	0.191836	0.861695
ECs0132	511.17	0.293168	0.266937	1.09827	0.272088	0.946604
ECs0133	254.262	-0.328023	0.266147	-1.23249	0.217767	0.896918
ECs0134	285.648	0.00111582	0.256711	0.00434661	0.996532	0.999269
ECs0135	358.062	0.0691388	0.258889	0.26706	0.789423	0.985586
ECs0136	132.421	-0.132208	0.312774	-0.422695	0.672518	0.982639
ECs0137	1315.12	0.228611	0.274518	0.832772	0.404973	0.980199
ECs0138	654.248	0.268951	0.281336	0.955977	0.339084	0.980199
ECs0139	188.605	-0.247169	0.262009	-0.943362	0.345496	0.980199
ECs0140	34.9996	0.23388	0.325484	0.718562	0.472411	0.980199
ECs0141	63.1646	0.155103	0.300357	0.516395	0.605579	0.980199
ECs0142	51.6708	-0.146382	0.303902	-0.481674	0.630037	0.980199
ECs0143	83.2463	0.0825576	0.289269	0.285401	0.775337	0.985081
ECs0144	10.4329	-0.396501	0.339955	-1.16633	0.243479	NA
ECs0145	15.4397	-0.38142	0.341699	-1.11624	0.264318	NA
ECs0146	343.029	0.315502	0.320668	0.983888	0.32517	0.980199
ECs0147	1411.68	0.410519	0.291346	1.40905	0.158822	0.844208
ECs0148	223.805	0.373756	0.286053	1.3066	0.191349	0.861392
ECs0149	9087	0.030958	0.232919	0.132913	0.894262	0.993106
ECs0150	3753.18	-0.115842	0.263297	-0.439965	0.659963	0.980199
ECs0151	37.151	-0.00528689	0.321062	-0.0164669	0.986862	0.999269
ECs0152	903.932	-0.0851236	0.238304	-0.357205	0.720938	0.983458
ECs0153	2963.91	-0.0601094	0.242314	-0.248064	0.804085	0.985586
ECs0154	865.234	0.948077	0.329187	2.88006	0.00397604	0.165548
ECs0155	106.056	0.746371	0.336313	2.21928	0.0264679	0.481044
ECs0156	81.2592	0.737731	0.341828	2.1582	0.0309127	0.506331
ECs0157	326.112	0.242144	0.292592	0.827581	0.407908	0.980199
ECs0158	5469.09	1.29455	0.246366	5.2546	1.48347e-07	2.9617e-05
ECs0159	1922.35	0.141813	0.235791	0.601437	0.547549	0.980199
ECs0160	1304.8	-0.00963089	0.237108	-0.0406181	0.9676	0.999269
ECs0161	91.5891	0.232286	0.283526	0.819275	0.41263	0.980199
ECs0162	238.365	0.175947	0.266871	0.659295	0.509706	0.980199
ECs0163	1462.31	0.0292154	0.241176	0.121137	0.903582	0.993106
ECs0164	605.663	0.301085	0.273028	1.10276	0.270131	0.946604
ECs0165	3885.33	0.66428	0.285664	2.32539	0.0200512	0.407697
ECs0166	184.071	0.0375517	0.293804	0.127812	0.898298	0.993106
ECs0167	4521.35	-0.187461	0.245761	-0.762776	0.445597	0.980199
ECs0168	1834.17	0.364394	0.275814	1.32116	0.186449	0.856477
ECs0169	732.395	0.0721446	0.2417	0.298488	0.765331	0.983458
ECs0170	707.961	0.261764	0.248471	1.0535	0.292113	0.958366
ECs0171	17652.9	0.601174	0.261157	2.30196	0.0213375	0.419423
ECs0172	8507.36	0.618252	0.278333	2.22126	0.0263332	0.480502
ECs0173	1676.65	0.339844	0.261403	1.30008	0.193574	0.86326
ECs0174	3399.27	0.0579269	0.234398	0.24713	0.804807	0.985586
ECs0175	585.083	-0.0393618	0.246299	-0.159813	0.873028	0.993106
ECs0176	815.742	0.0513125	0.270983	0.189356	0.849813	0.991124
ECs0177	963.795	0.123934	0.26744	0.463409	0.643071	0.980199
ECs0178	2791.97	-0.0342021	0.239496	-0.142808	0.886441	0.993106
ECs0179	11539	-0.0685674	0.242424	-0.282841	0.777299	0.985081
ECs0180	5737.21	-0.151119	0.232508	-0.649954	0.515722	0.980199
ECs0181	4702.24	-0.0937944	0.233201	-0.402205	0.687533	0.982645
ECs0182	1608.07	0.125944	0.250392	0.502986	0.614974	0.980199
ECs0183	2358.31	0.223576	0.245149	0.912002	0.361768	0.980199
ECs0184	922.185	0.23991	0.25777	0.930713	0.352002	0.980199
ECs0185	451.206	0.318895	0.265309	1.20198	0.229372	0.908511
ECs0186	3341.07	0.122219	0.241896	0.505255	0.61338	0.980199
ECs0187	1574.77	0.203541	0.237274	0.857829	0.390987	0.980199
ECs0188	3373.05	-0.172775	0.23508	-0.73496	0.462364	0.980199
ECs0189	935.085	-0.283566	0.267951	-1.05828	0.28993	0.958175
ECs0190	838.276	0.143117	0.245526	0.5829	0.559961	0.980199
ECs0191	969.635	-0.168902	0.254215	-0.664406	0.506431	0.980199
ECs0192	159.836	-0.181402	0.273094	-0.664249	0.506531	0.980199
ECs0193	317.355	0.604545	0.251509	2.40367	0.0162313	0.374691
ECs0194	1015.34	0.447657	0.242839	1.84343	0.0652664	0.67629
ECs0195	24.6837	0.489017	0.333974	1.46424	0.14313	0.833473
ECs0196	2398.77	0.229082	0.293428	0.78071	0.434973	0.980199
ECs0197	275.469	0.10859	0.266037	0.408177	0.683144	0.982645
ECs0198	465.039	0.110999	0.275785	0.402483	0.687328	0.982645
ECs0199	3469.55	-0.282307	0.241726	-1.16788	0.242856	0.918745
ECs0200	634.783	-0.209653	0.260054	-0.806189	0.420134	0.980199
ECs0201	999.309	-0.553762	0.275544	-2.0097	0.0444627	0.579074
ECs0202	428.428	-0.221873	0.260521	-0.851651	0.394408	0.980199
ECs0203	227.54	-0.239818	0.25993	-0.922626	0.356202	0.980199
ECs0204	352.964	-0.0350868	0.250548	-0.14004	0.888628	0.993106
ECs0205	1260.52	-0.0807282	0.253338	-0.318658	0.749986	0.983458
ECs0206	920.674	0.0845848	0.248728	0.34007	0.733804	0.983458
ECs0207	2090.85	0.232303	0.272412	0.852765	0.39379	0.980199
ECs0208	1303.25	0.125622	0.243735	0.515404	0.606271	0.980199
ECs0209	266.276	-0.221109	0.275203	-0.803439	0.421721	0.980199
ECs0210	157.018	-0.399706	0.266055	-1.50234	0.133008	0.829554
ECs0211	652.98	-0.194317	0.256953	-0.756235	0.449508	0.980199
ECs0212	13.7611	-0.285263	0.341899	-0.834349	0.404084	NA
ECs0213	8.6309	-0.0755828	0.333399	-0.226704	0.820654	NA
ECs0214	1.09169	0.0448444	0.173102	0.259064	0.795586	NA
ECs0216	3.70901	0.0787612	0.287191	0.274246	0.783895	NA
ECs0217	32.4869	-0.105828	0.323189	-0.327449	0.743328	0.983458
ECs0218	41.5968	-0.103528	0.316959	-0.326628	0.743949	0.983458
ECs0220	7.36315	0.202633	0.298011	0.67995	0.496536	NA
ECs0221	18.1164	-0.248914	0.341787	-0.728273	0.466447	NA
ECs0222	32.0342	0.00765923	0.341488	0.022429	0.982106	0.999269
ECs0223	268.109	-0.020148	0.260992	-0.0771979	0.938466	0.999269
ECs0224	52.7415	-0.412835	0.318105	-1.29779	0.194359	0.865916
ECs0225	140.44	-0.0544893	0.272665	-0.19984	0.841606	0.989814
ECs0226	40.7766	-0.0292733	0.313472	-0.093384	0.925598	0.998879
ECs0227	84.6114	-0.191635	0.289807	-0.661252	0.508451	0.980199
ECs0228	42.4357	-0.12701	0.318762	-0.398446	0.690302	0.982645
ECs0229	95.6898	-0.200282	0.280875	-0.713064	0.475806	0.980199
ECs0230	35.43	-0.417621	0.332043	-1.25773	0.208489	0.887855
ECs0231	101.78	-0.0174067	0.304041	-0.0572512	0.954345	0.999269
ECs0232	19.0625	0.079522	0.340385	0.233624	0.815277	NA
ECs0233	67.9661	0.0100345	0.310284	0.0323396	0.974201	0.999269
ECs0234	174.548	-0.237558	0.268839	-0.883645	0.376888	0.980199
ECs0235	3.10717	0.443546	0.272864	1.62552	0.104052	NA
ECs0236	63.1662	-0.289877	0.297531	-0.974277	0.329919	0.980199
ECs0237	264.237	-0.225469	0.266493	-0.846059	0.39752	0.980199
ECs0238	96.2932	-0.207184	0.30757	-0.673614	0.500557	0.980199
ECs0239	18.7752	-0.47389	0.340511	-1.3917	0.164013	NA
ECs0240	2.08891	-0.0895592	0.217708	-0.411374	0.680799	NA
ECs0241	41.7168	-0.00972969	0.316221	-0.0307687	0.975454	0.999269
ECs0242	229.787	-0.0329082	0.262546	-0.125343	0.900252	0.993106
ECs0243	4.58834	0.100408	0.302074	0.332393	0.739592	NA
ECs0244	18.2191	-0.081722	0.340936	-0.239699	0.810563	NA
ECs0245	18.7642	0.441403	0.341292	1.29333	0.195897	NA
ECs0246	406.408	0.179656	0.256128	0.701428	0.483036	0.980199
ECs0247	12856	0.230576	0.272445	0.846321	0.397374	0.980199
ECs0248	2127.39	0.255119	0.247426	1.03109	0.302498	0.968838
ECs0249	1336.65	0.251904	0.244473	1.0304	0.302824	0.969206
ECs0250	826.395	0.0776293	0.256837	0.302252	0.76246	0.983458
ECs0251	212.3	0.212428	0.265727	0.799423	0.424045	0.980199
ECs0252	287.337	-0.498537	0.270648	-1.84202	0.0654728	0.676897
ECs0253	929.617	-0.328342	0.268662	-1.22214	0.221656	0.900631
ECs0254	60.8405	0.115696	0.30115	0.38418	0.700845	0.983002
ECs0255	60.0021	-0.193281	0.305166	-0.633363	0.526496	0.980199
ECs0256	5.35612	-0.115562	0.307989	-0.375215	0.707501	NA
ECs0257	40.697	0.128913	0.328999	0.391834	0.695181	0.982645
ECs0258	432.162	0.285043	0.245247	1.16227	0.245126	0.918745
ECs0259	158.607	-0.074467	0.283003	-0.263131	0.79245	0.985586
ECs0260	97.2616	-0.0866583	0.29126	-0.297529	0.766063	0.983458
ECs0261	20.6753	0.00066624	0.336156	0.00198194	0.998419	NA
ECs0262	5.69434	0.140981	0.319103	0.441805	0.658631	NA
ECs0263	2.88658	-0.144967	0.271425	-0.534096	0.593275	NA
ECs0264	7294.31	0.0353151	0.258556	0.136586	0.891358	0.993106
ECs0265	226.733	-0.168624	0.25845	-0.652444	0.514115	0.980199
ECs0266	798.756	0.0417157	0.241804	0.172519	0.86303	0.992636
ECs0267	1398.56	0.276784	0.295166	0.937725	0.348386	0.980199
ECs0268	12.771	0.5799	0.337654	1.71744	0.0858992	NA
ECs0269	1057.88	0.284453	0.267733	1.06245	0.288031	0.958175
ECs0270	2108.27	0.0118969	0.254255	0.0467913	0.96268	0.999269
ECs0271	629.886	-0.142108	0.257634	-0.551591	0.581229	0.980199
ECs0272	184.267	0.0878536	0.272882	0.321947	0.747493	0.983458
ECs0273	109.894	-0.367874	0.280368	-1.31211	0.189482	0.861392
ECs0274	2119.24	-0.293803	0.25241	-1.16399	0.244428	0.918745
ECs0275	19.9573	0.436436	0.340705	1.28098	0.200202	NA
ECs0276	13.5992	0.206358	0.34193	0.603509	0.54617	NA
ECs0280	66.8436	0.276878	0.296551	0.933659	0.35048	0.980199
ECs0281	86.5671	-0.0140807	0.292028	-0.0482169	0.961543	0.999269
ECs0282	22.4583	0.489369	0.334703	1.4621	0.143714	0.834233
ECs0283	13.007	0.351384	0.332603	1.05647	0.290754	NA
ECs0284	16.5968	0.0144383	0.341359	0.0422966	0.966262	NA
ECs0285	413.804	0.243615	0.28029	0.869151	0.384765	0.980199
ECs0287	1533.95	0.366819	0.244202	1.50211	0.133068	0.829554
ECs0288	2.50769	-0.0365626	0.250647	-0.145873	0.884022	NA
ECs0289	433.558	-0.8737	0.254569	-3.43207	0.000598996	0.0428656
ECs0290	46.7076	-0.664006	0.323637	-2.0517	0.0401985	0.565459
ECs0291	0.772978	0.125133	0.138872	0.901066	0.367553	NA
ECs0292	1.00462	0.052563	0.161234	0.326005	0.744421	NA
ECs0293	0.830112	-0.106047	0.125267	-0.846569	0.397235	NA
ECs0294	0.16399	-0.041441	0.111479	-0.371739	0.710087	NA
ECs0295	0.593139	-0.0122954	0.120216	-0.102277	0.918537	NA
ECs0296	84.2448	0.300414	0.286554	1.04837	0.294468	0.959021
ECs0297	85.4724	0.281119	0.287799	0.976788	0.328674	0.980199
ECs0298	28.7475	0.34675	0.335581	1.03328	0.301472	0.967583
ECs0299	16.982	0.579107	0.340419	1.70116	0.0889133	NA
ECs0300	119.157	0.662457	0.277385	2.38822	0.0169301	0.379032
ECs0301	32.9941	0.0379984	0.323441	0.117482	0.906478	0.993106
ECs0302	55.5981	0.0490404	0.30167	0.162563	0.870863	0.993106
ECs0303	332.825	0.0594087	0.251839	0.2359	0.81351	0.986053
ECs0304	58.0601	0.30403	0.32368	0.93929	0.347582	0.980199
ECs0305	58.5927	0.0570446	0.305201	0.186908	0.851733	0.991575
ECs0306	26.5268	-0.389526	0.333737	-1.16716	0.243144	0.918745
ECs0307	1.58275	0.0547676	0.20834	0.262876	0.792646	NA
ECs0309	108.537	0.051121	0.276087	0.185162	0.853102	0.991575
ECs0310	162.082	-0.255228	0.266907	-0.956243	0.338949	0.980199
ECs0311	24.7795	-0.139359	0.336663	-0.413941	0.678917	0.982645
ECs0313	340.588	-0.326807	0.287102	-1.1383	0.254997	0.927655
ECs0314	1169.93	-0.389945	0.249441	-1.56327	0.117988	0.807444
ECs0315	272.435	-0.0215251	0.274914	-0.0782977	0.937591	0.999269
ECs0316	184.929	0.10962	0.281037	0.390054	0.696496	0.982645
ECs0317	434.903	-0.578799	0.250286	-2.31255	0.0207474	0.412286
ECs0318	30.253	0.0928605	0.333153	0.278732	0.780451	0.985081
ECs0319	113.553	-0.123998	0.283331	-0.437645	0.661644	0.980199
ECs0320	149.296	0.153659	0.276638	0.555452	0.578585	0.980199
ECs0321	178.699	0.330191	0.274508	1.20284	0.229037	0.908511
ECs0322	33.9556	0.89781	0.33049	2.7166	0.00659554	0.22261
ECs0323	46.268	0.934696	0.324089	2.88407	0.00392573	0.165548
ECs0324	28.9984	0.628953	0.329388	1.90946	0.0562031	0.641141
ECs0326	6.44977	-0.325231	0.31858	-1.02088	0.307314	NA
ECs0327	45.1665	0.0825177	0.309415	0.26669	0.789708	0.985586
ECs0328	15.9873	-0.151384	0.340823	-0.444172	0.656918	NA
ECs0329	13.8958	-0.00511318	0.341583	-0.0149691	0.988057	NA
ECs0330	100.689	-0.122779	0.278213	-0.441312	0.658987	0.980199
ECs0331	23.9323	-0.152089	0.333505	-0.456032	0.648367	0.980199
ECs0332	495.87	-0.0823458	0.249593	-0.329921	0.74146	0.983458
ECs0333	441.1	0.570661	0.260763	2.18843	0.0286382	0.487595
ECs0334	177.694	0.165894	0.269091	0.616498	0.537566	0.980199
ECs0335	37.1578	-0.0377853	0.322937	-0.117005	0.906856	0.993106
ECs0336	205.534	-0.228568	0.262795	-0.869758	0.384433	0.980199
ECs0337	333.435	0.394157	0.270683	1.45615	0.14535	0.837701
ECs0338	2183.93	-0.132734	0.252604	-0.525463	0.599262	0.980199
ECs0340	23.2226	-0.020619	0.333268	-0.0618691	0.950667	0.999269
ECs0341	4.86806	0.0968677	0.303356	0.31932	0.749484	NA
ECs0342	1575.14	0.0486528	0.238373	0.204104	0.838273	0.989762
ECs0343	69.0293	0.590474	0.310429	1.90213	0.0571548	0.642727
ECs0344	180.634	-0.103312	0.266844	-0.387162	0.698636	0.982645
ECs0345	462.652	-0.153251	0.259103	-0.59147	0.554206	0.980199
ECs0346	260.278	-0.268315	0.27608	-0.971874	0.331113	0.980199
ECs0347	1.01247	-0.20692	0.168996	-1.22441	0.220799	NA
ECs0348	0	NA	NA	NA	NA	NA
ECs0349	32.3083	-0.525762	0.325805	-1.61373	0.106586	0.790956
ECs0350	38.01	-0.299053	0.317873	-0.940795	0.34681	0.980199
ECs0351	12.2512	-0.247523	0.341366	-0.725094	0.468394	NA
ECs0352	1.86538	0.158231	0.235494	0.671912	0.50164	NA
ECs0353	0.826533	-0.00403244	0.136646	-0.0295102	0.976458	NA
ECs0357	1023.49	0.206323	0.241837	0.853151	0.393575	0.980199
ECs0358	899.402	0.356084	0.256258	1.38956	0.164664	0.845472
ECs0359	343.969	0.44459	0.26682	1.66625	0.0956632	0.754109
ECs0360	485.896	0.286787	0.258765	1.10829	0.267737	0.94544
ECs0362	289.8	0.0848544	0.25552	0.332085	0.739825	0.983458
ECs0363	163.314	0.313875	0.281765	1.11396	0.265296	0.941018
ECs0366	3.53482	-0.167766	0.291378	-0.575768	0.564772	NA
ECs0367	46.7416	0.0566673	0.319422	0.177406	0.85919	0.991923
ECs0368	6.77796	0.22242	0.31073	0.715796	0.474118	NA
ECs0369	21.5288	0.343325	0.341685	1.0048	0.314994	0.976206
ECs0370	19.2179	-0.148283	0.341659	-0.434009	0.664282	NA
ECs0372	16.7179	0.413075	0.3411	1.21101	0.225892	NA
ECs0373	162.797	0.363795	0.267616	1.35939	0.174022	0.854257
ECs0374	284.378	-0.082604	0.256128	-0.322511	0.747066	0.983458
ECs0375	19.5422	-0.254355	0.337274	-0.754149	0.45076	NA
ECs0376	75.4852	-0.258508	0.298844	-0.865026	0.387024	0.980199
ECs0377	115.187	0.0899594	0.274823	0.327335	0.743414	0.983458
ECs0378	698.532	-0.161845	0.245365	-0.659609	0.509505	0.980199
ECs0379	4830.93	0.000734312	0.240945	0.00304763	0.997568	0.999269
ECs0380	3.63911	0.19666	0.270492	0.727044	0.467199	NA
ECs0382	277.434	-0.143941	0.269368	-0.534368	0.593087	0.980199
ECs0383	7341.77	-0.145871	0.285655	-0.510653	0.609594	0.980199
ECs0384	404.235	0.487735	0.30511	1.59855	0.10992	0.794059
ECs0385	1794.07	0.960733	0.284488	3.37706	0.000732645	0.0499498
ECs0386	2685.62	0.830221	0.275508	3.01342	0.00258321	0.128599
ECs0387	3027.32	0.757781	0.279853	2.70778	0.00677339	0.224798
ECs0388	3174.42	0.594241	0.276249	2.15111	0.0314678	0.509267
ECs0389	661.608	0.32031	0.306156	1.04623	0.295454	0.959021
ECs0390	1750.79	0.161753	0.267073	0.605653	0.544746	0.980199
ECs0391	36.9644	0.340794	0.317825	1.07227	0.283599	0.957941
ECs0392	19.6616	-0.365261	0.33786	-1.0811	0.279652	NA
ECs0393	70.1938	-0.197484	0.303266	-0.651192	0.514922	0.980199
ECs0394	36.9278	-0.144904	0.316831	-0.457355	0.647416	0.980199
ECs0395	30.3359	0.062502	0.325348	0.192108	0.847657	0.990306
ECs0396	50.7086	-0.289102	0.321985	-0.897875	0.369252	0.980199
ECs0397	138.116	-0.160315	0.283888	-0.564713	0.572269	0.980199
ECs0398	281.79	0.480475	0.278437	1.72561	0.0844169	0.737842
ECs0399	214.963	0.194819	0.256966	0.758149	0.448362	0.980199
ECs0400	216.156	-0.0113691	0.257907	-0.0440821	0.964839	0.999269
ECs0401	86.5343	0.569003	0.310947	1.8299	0.0672643	0.687658
ECs0402	12.3272	-0.352091	0.341327	-1.03153	0.30229	NA
ECs0403	7.28846	0.147559	0.327321	0.450809	0.652127	NA
ECs0404	13.6653	0.360382	0.341911	1.05402	0.291873	NA
ECs0405	20.4677	0.100185	0.338602	0.295878	0.767323	NA
ECs0406	42.6061	0.111759	0.327944	0.340788	0.733263	0.983458
ECs0407	49.9964	0.0046189	0.31916	0.0144721	0.988453	0.999269
ECs0408	68.0848	0.0381518	0.30964	0.123214	0.901938	0.993106
ECs0409	191.01	-0.040696	0.268408	-0.15162	0.879487	0.993106
ECs0410	255.267	-0.260056	0.256402	-1.01425	0.310463	0.97454
ECs0411	1712.95	-0.0844788	0.237892	-0.355114	0.722504	0.983458
ECs0412	462.738	-0.0514181	0.249812	-0.205827	0.836926	0.989762
ECs0413	125.769	-0.422897	0.273051	-1.54879	0.121433	0.807444
ECs0414	124.658	0.0231767	0.289419	0.0800801	0.936174	0.999269
ECs0415	839.285	-0.300852	0.246537	-1.22031	0.222347	0.900631
ECs0416	454.139	-0.0785665	0.246936	-0.318165	0.750359	0.983458
ECs0417	257.264	0.23534	0.25932	0.907528	0.364128	0.980199
ECs0418	539.604	-0.420926	0.259329	-1.62313	0.104561	0.789945
ECs0419	15.8805	0.176483	0.341591	0.516649	0.605401	NA
ECs0420	20.9164	-0.124572	0.341776	-0.364484	0.715497	0.983458
ECs0421	21.5894	0.362488	0.339859	1.06658	0.28616	0.958175
ECs0422	72.6438	0.278398	0.298152	0.933746	0.350435	0.980199
ECs0423	793.283	0.290402	0.275965	1.05231	0.292656	0.959021
ECs0424	527.68	-0.116449	0.253859	-0.458714	0.64644	0.980199
ECs0425	2.02383	0.110099	0.236271	0.465984	0.641227	NA
ECs0426	771.571	1.22331	0.295291	4.14272	3.43217e-05	0.00420626
ECs0427	204.841	0.150185	0.262035	0.573147	0.566545	0.980199
ECs0428	688.934	0.0847814	0.241417	0.351183	0.725451	0.983458
ECs0429	46.4564	-0.559937	0.315493	-1.7748	0.0759307	0.710034
ECs0430	248.321	-0.020718	0.282824	-0.073254	0.941604	0.999269
ECs0431	1501.66	0.498112	0.296991	1.67719	0.0935044	0.751423
ECs0432	1467.8	-0.129319	0.239446	-0.540073	0.589146	0.980199
ECs0433	779.301	-0.0375881	0.239595	-0.156882	0.875338	0.993106
ECs0434	3547.78	-0.176109	0.274474	-0.641626	0.521116	0.980199
ECs0435	63.7189	0.0806496	0.297918	0.27071	0.786614	0.985586
ECs0436	70.5702	0.114275	0.302264	0.378063	0.705384	0.983309
ECs0437	1644.54	-0.122339	0.253083	-0.483394	0.628816	0.980199
ECs0438	159.083	-0.0323237	0.264337	-0.122282	0.902676	0.993106
ECs0439	2139.15	-0.225398	0.268949	-0.838071	0.401991	0.980199
ECs0440	159.065	0.646462	0.269751	2.39652	0.0165517	0.379032
ECs0441	546.612	-0.151509	0.25961	-0.583604	0.559487	0.980199
ECs0442	8.81563	0.198257	0.33648	0.589209	0.555721	NA
ECs0443	7.7313	0.47011	0.326707	1.43893	0.150169	NA
ECs0444	922.869	0.0619752	0.253598	0.244384	0.806934	0.985621
ECs0445	396.42	0.48814	0.262563	1.85913	0.0630082	0.663397
ECs0446	235.317	-0.04012	0.255045	-0.157306	0.875004	0.993106
ECs0447	995.081	-0.12302	0.246987	-0.498081	0.618427	0.980199
ECs0448	113.075	0.290943	0.316042	0.920583	0.357268	0.980199
ECs0449	302.827	0.105568	0.250354	0.421677	0.673261	0.982639
ECs0450	301.162	0.139033	0.255073	0.545074	0.585703	0.980199
ECs0451	736.133	-0.142007	0.265197	-0.535476	0.592321	0.980199
ECs0452	218.715	0.339093	0.27755	1.22174	0.221808	0.900631
ECs0453	299.72	0.19867	0.267313	0.74321	0.457355	0.980199
ECs0454	44.5864	-0.0748435	0.312366	-0.239602	0.810639	0.986053
ECs0455	140.703	-0.0888169	0.271305	-0.327369	0.743389	0.983458
ECs0456	162.362	0.198679	0.288939	0.687617	0.491694	0.980199
ECs0457	2679.52	0.078194	0.258532	0.302453	0.762307	0.983458
ECs0458	2999.52	0.0852699	0.249847	0.341289	0.732886	0.983458
ECs0459	2837.77	0.256866	0.275752	0.931508	0.351591	0.980199
ECs0460	1793.03	0.104145	0.260583	0.399661	0.689406	0.982645
ECs0461	456.736	-0.257201	0.27976	-0.919361	0.357907	0.980199
ECs0462	349.345	-0.336195	0.279882	-1.2012	0.229672	0.908511
ECs0463	417.844	-0.198501	0.248967	-0.797299	0.425278	0.980199
ECs0464	1491	-0.355907	0.276092	-1.28909	0.197366	0.871358
ECs0465	91.959	-0.13035	0.290428	-0.448819	0.653562	0.980199
ECs0466	697.539	-0.500317	0.248081	-2.01675	0.0437219	0.577079
ECs0467	1034.4	-0.300821	0.244531	-1.2302	0.218623	0.897783
ECs0468	1220.65	0.0216453	0.239553	0.090357	0.928004	0.999269
ECs0469	1006.33	0.0116196	0.24821	0.0468136	0.962662	0.999269
ECs0470	403.108	-0.00022458	0.255925	-0.000877526	0.9993	0.999362
ECs0471	182.043	-0.140786	0.262532	-0.536264	0.591776	0.980199
ECs0472	66.8643	-0.0744432	0.299501	-0.248557	0.803703	0.985586
ECs0473	4732.14	-0.175938	0.266801	-0.659434	0.509617	0.980199
ECs0474	894.259	0.406832	0.294775	1.38015	0.167542	0.852909
ECs0475	375.169	0.411368	0.294488	1.39689	0.162446	0.844208
ECs0476	339.268	0.13202	0.251233	0.525489	0.599243	0.980199
ECs0477	248.156	0.185631	0.29783	0.623277	0.533103	0.980199
ECs0478	369.074	0.12829	0.254547	0.503993	0.614266	0.980199
ECs0479	621.568	-0.192274	0.255288	-0.753166	0.45135	0.980199
ECs0480	2472.94	-0.0848141	0.233498	-0.363233	0.716431	0.983458
ECs0481	247.561	0.200996	0.27078	0.742285	0.457915	0.980199
ECs0482	6280.49	-0.0124999	0.281267	-0.0444414	0.964553	0.999269
ECs0483	3521.57	-0.0697488	0.293016	-0.238038	0.811852	0.986053
ECs0484	5598.34	-0.0367024	0.295083	-0.12438	0.901014	0.993106
ECs0485	10323.1	0.126548	0.308652	0.410003	0.681804	0.982645
ECs0486	3458.45	0.302964	0.31018	0.976737	0.328699	0.980199
ECs0487	188.288	0.633525	0.29308	2.16161	0.0306482	0.506331
ECs0488	277.989	0.303572	0.27159	1.11776	0.263671	0.939097
ECs0489	13047.6	-0.238653	0.3031	-0.787375	0.431062	0.980199
ECs0490	6129.27	0.38453	0.319009	1.20539	0.228052	0.908511
ECs0491	5425.08	-0.0628824	0.247979	-0.25358	0.79982	0.985586
ECs0492	10334.9	0.0859371	0.239464	0.358873	0.71969	0.983458
ECs0493	11190.6	0.552849	0.262773	2.10391	0.0353866	0.536658
ECs0494	8945.37	-0.0715965	0.247118	-0.289726	0.772026	0.985081
ECs0495	2050.2	0.373159	0.278831	1.3383	0.180799	0.856477
ECs0496	69.5299	-0.147184	0.293348	-0.50174	0.61585	0.980199
ECs0497	318.759	0.333229	0.263819	1.2631	0.206554	0.885194
ECs0498	206.031	0.258826	0.288434	0.897348	0.369533	0.980199
ECs0499	318.947	-0.154006	0.275421	-0.559168	0.576047	0.980199
ECs0500	129.725	0.0172928	0.277619	0.0622895	0.950332	0.999269
ECs0501	241.098	0.171311	0.273602	0.626131	0.531229	0.980199
ECs0502	219.142	0.325179	0.260988	1.24596	0.212781	0.887855
ECs0503	398.177	0.281982	0.246681	1.14311	0.252995	0.92689
ECs0504	6.80191	-0.097507	0.32275	-0.302113	0.762566	NA
ECs0505	107.908	-0.104552	0.279295	-0.374342	0.70815	0.983458
ECs0506	472.242	0.57998	0.284495	2.03863	0.0414872	0.570604
ECs0507	10346.8	-0.162062	0.251891	-0.64338	0.519977	0.980199
ECs0508	134.785	-0.235633	0.272363	-0.865141	0.386962	0.980199
ECs0509	1107.89	-0.181029	0.299512	-0.604412	0.54557	0.980199
ECs0510	1435.03	-0.117117	0.246473	-0.475172	0.634664	0.980199
ECs0511	626.734	-0.0568052	0.253156	-0.224388	0.822455	0.988497
ECs0512	278.5	-0.305523	0.275929	-1.10725	0.268185	0.946292
ECs0513	1593.97	-0.397382	0.278505	-1.42684	0.153625	0.844208
ECs0514	3238.63	-0.339524	0.289596	-1.17241	0.241033	0.916847
ECs0515	8859.67	-0.169882	0.239126	-0.71043	0.477437	0.980199
ECs0516	1965.14	0.211146	0.291459	0.724445	0.468792	0.980199
ECs0517	153.407	0.0950948	0.268389	0.354317	0.723101	0.983458
ECs0518	1341.66	0.223861	0.235778	0.949456	0.342389	0.980199
ECs0519	80.3749	0.385353	0.289864	1.32943	0.183707	0.856477
ECs0520	153.058	-0.114901	0.26883	-0.427412	0.669079	0.981544
ECs0521	28.1397	0.516736	0.337871	1.52939	0.126168	0.812726
ECs0522	278.385	0.325065	0.279934	1.16122	0.245552	0.918745
ECs0523	1261.15	0.161181	0.255172	0.631655	0.527612	0.980199
ECs0524	2041.8	-0.078468	0.242306	-0.323838	0.746061	0.983458
ECs0525	969.78	0.0847398	0.26486	0.319941	0.749013	0.983458
ECs0526	12429.7	0.806205	0.237059	3.40087	0.000671722	0.0466135
ECs0527	1927.6	0.793252	0.319753	2.48082	0.0131079	0.338825
ECs0528	1520.2	-0.237357	0.270967	-0.875963	0.38105	0.980199
ECs0529	110.27	-0.278381	0.278295	-1.00031	0.317161	0.976206
ECs0530	287.385	0.44179	0.311929	1.41632	0.156683	0.844208
ECs0531	6235.11	-0.207713	0.256473	-0.809881	0.418009	0.980199
ECs0532	173.963	0.557225	0.289495	1.92482	0.0542519	0.629226
ECs0533	3381.05	-0.22272	0.249389	-0.893063	0.371823	0.980199
ECs0534	223.197	0.0309379	0.266837	0.115943	0.907698	0.993106
ECs0535	315.692	0.127632	0.253798	0.50289	0.615042	0.980199
ECs0536	982.272	-0.430319	0.251577	-1.71048	0.0871768	0.740761
ECs0537	7382.5	-0.170037	0.247333	-0.687481	0.49178	0.980199
ECs0538	7439.42	-0.382901	0.23751	-1.61215	0.106929	0.790956
ECs0539	9273.92	-0.373717	0.253566	-1.47384	0.140524	0.831677
ECs0540	1082.68	0.0527902	0.248023	0.212844	0.831449	0.9891
ECs0541	3024.22	-0.027915	0.237987	-0.117296	0.906625	0.993106
ECs0542	506.608	-0.141379	0.249344	-0.567005	0.570711	0.980199
ECs0543	58.5703	0.0361008	0.303543	0.118931	0.90533	0.993106
ECs0544	218.887	-0.207865	0.268861	-0.773132	0.439444	0.980199
ECs0545	231.692	-0.381	0.271314	-1.40428	0.160237	0.844208
ECs0546	3.33781	-0.206316	0.26781	-0.770384	0.441072	NA
ECs0548	5.97354	0.350939	0.295659	1.18697	0.235238	NA
ECs0549	158.46	-0.140644	0.269788	-0.521313	0.602149	0.980199
ECs0551	1235.94	-0.498214	0.305519	-1.63071	0.102951	0.785857
ECs0552	3546.28	-0.44791	0.287362	-1.55869	0.119069	0.807444
ECs0553	328.378	0.204141	0.250665	0.814397	0.415417	0.980199
ECs0554	231.656	0.367993	0.266788	1.37934	0.167788	0.852909
ECs0555	2410.12	0.313741	0.249793	1.256	0.209115	0.887855
ECs0556	332.035	0.332681	0.25825	1.28821	0.197673	0.871358
ECs0557	242.014	0.158874	0.271256	0.585695	0.55808	0.980199
ECs0558	163.895	0.300442	0.284525	1.05594	0.290994	0.958206
ECs0559	469.863	0.151362	0.257909	0.58688	0.557284	0.980199
ECs0560	175.943	-0.228282	0.268726	-0.849498	0.395604	0.980199
ECs0561	2.79701	-0.0786778	0.253238	-0.310687	0.756038	NA
ECs0563	62.4392	-0.0243189	0.297612	-0.0817134	0.934875	0.999269
ECs0564	93.1558	0.236288	0.28406	0.831824	0.405508	0.980199
ECs0565	89.9098	-0.45046	0.300635	-1.49836	0.134039	0.830715
ECs0566	153.556	-0.13628	0.273756	-0.497815	0.618614	0.980199
ECs0567	3174.39	-0.031597	0.270791	-0.116684	0.90711	0.993106
ECs0568	106.916	-0.32611	0.281525	-1.15837	0.246713	0.918745
ECs0569	39.7944	-0.408463	0.321858	-1.26908	0.204413	0.880724
ECs0570	98.0741	-0.377403	0.302574	-1.24731	0.212283	0.887855
ECs0571	2.18316	-0.0862787	0.224749	-0.383889	0.701061	NA
ECs0572	30.2088	-0.252327	0.329226	-0.766423	0.443424	0.980199
ECs0575	53.8704	0.381099	0.309637	1.23079	0.218401	0.897783
ECs0576	83.0216	-0.0754355	0.296194	-0.254683	0.798968	0.985586
ECs0577	313.907	-0.505441	0.260369	-1.94124	0.0522286	0.617147
ECs0578	147.214	-0.533748	0.270832	-1.97077	0.0487502	0.609646
ECs0579	24.9115	-0.231782	0.341883	-0.677956	0.497799	0.980199
ECs0580	13.1757	-0.152669	0.341725	-0.446759	0.655049	NA
ECs0581	24.1177	-0.321565	0.333918	-0.963005	0.335545	0.980199
ECs0582	14.3343	-0.140281	0.341783	-0.410439	0.681484	NA
ECs0583	24.8028	-0.00558392	0.333299	-0.0167535	0.986633	0.999269
ECs0584	1052.73	0.513924	0.318341	1.61438	0.106444	0.790956
ECs0585	239.199	0.387543	0.311948	1.24233	0.214115	0.891495
ECs0586	244.384	0.144123	0.287286	0.501671	0.615899	0.980199
ECs0587	2773.85	0.13057	0.275667	0.473651	0.635749	0.980199
ECs0588	703.641	0.711355	0.298179	2.38567	0.0170482	0.379032
ECs0589	21.8242	-0.172258	0.337028	-0.511108	0.609276	0.980199
ECs0590	142.036	0.175586	0.277939	0.631742	0.527555	0.980199
ECs0591	481.74	0.0458885	0.26126	0.175643	0.860575	0.992007
ECs0592	42.7932	-0.032893	0.319259	-0.103029	0.91794	0.996956
ECs0593	0.974334	0.153764	0.1526	1.00763	0.313633	NA
ECs0594	9.8665	0.421839	0.338083	1.24774	0.212127	NA
ECs0595	4.8646	0.133001	0.301353	0.441345	0.658963	NA
ECs0596	4.1155	0.176876	0.29778	0.593983	0.552523	NA
ECs0597	1.57224	-0.195139	0.202462	-0.96383	0.335131	NA
ECs0598	50.3083	0.0365552	0.316694	0.115427	0.908106	0.993106
ECs0599	171.181	-0.551928	0.272103	-2.02838	0.0425215	0.574479
ECs0600	809.252	-0.296558	0.250458	-1.18406	0.236388	0.914863
ECs0601	412.042	-0.180659	0.262441	-0.688377	0.491216	0.980199
ECs0602	45.2744	0.166771	0.30919	0.53938	0.589625	0.980199
ECs0603	530.709	0.148242	0.242947	0.610181	0.541742	0.980199
ECs0604	250.005	0.164566	0.27313	0.602518	0.546829	0.980199
ECs0605	543.702	-0.00910126	0.24236	-0.0375526	0.970044	0.999269
ECs0606	8.40473	0.200784	0.33248	0.603899	0.545911	NA
ECs0607	6.11148	0.0353139	0.32331	0.109226	0.913023	NA
ECs0608	155.515	0.47264	0.282726	1.67173	0.0945785	0.751423
ECs0609	200.951	0.17972	0.265891	0.675917	0.499093	0.980199
ECs0610	3.86841	0.0544772	0.299627	0.181817	0.855727	NA
ECs0611	4.54108	-0.0242235	0.302509	-0.0800752	0.936177	NA
ECs0612	12.3595	-0.305082	0.341753	-0.892698	0.372019	NA
ECs0613	92.4421	-0.0467705	0.289256	-0.161692	0.871548	0.993106
ECs0614	185.267	0.390543	0.279339	1.3981	0.162083	0.844208
ECs0615	349.634	0.333241	0.286439	1.16339	0.24467	0.918745
ECs0616	1318.35	0.197923	0.242014	0.817815	0.413463	0.980199
ECs0617	192.279	0.00554764	0.276025	0.0200984	0.983965	0.999269
ECs0618	140.446	-0.139688	0.281558	-0.496125	0.619806	0.980199
ECs0619	2898.77	-0.35398	0.281529	-1.25735	0.208627	0.887855
ECs0620	169.24	0.0717309	0.275894	0.259994	0.794868	0.985586
ECs0621	195.673	0.028679	0.282523	0.101511	0.919145	0.997319
ECs0622	14.6898	0.733385	0.341908	2.14498	0.0319545	NA
ECs0623	228.267	0.397268	0.295413	1.34479	0.178693	0.856477
ECs0624	52.3484	0.53527	0.260715	2.05309	0.040064	0.565459
ECs0625	397.963	0.9652	0.329741	2.92714	0.00342089	0.15388
ECs0626	4.90757	-0.134624	0.305821	-0.440205	0.659789	NA
ECs0627	50.1404	0.827447	0.341593	2.42232	0.0154218	0.367875
ECs0628	29.4873	0.796391	0.337169	2.36199	0.0181771	0.387214
ECs0629	26.5986	0.90581	0.341914	2.64923	0.00806746	0.251354
ECs0630	47.3827	0.985005	0.341923	2.88078	0.00396694	0.165548
ECs0631	168.971	1.087	0.334012	3.25439	0.00113637	0.0733036
ECs0632	68.9181	0.252572	0.192481	1.3122	0.189454	0.861392
ECs0633	138.215	0.529257	0.283473	1.86705	0.0618952	0.663397
ECs0634	162.162	1.03312	0.33472	3.08653	0.0020251	0.110013
ECs0635	151.575	0.836723	0.331748	2.52216	0.0116635	0.319874
ECs0636	114.269	0.454393	0.305036	1.48964	0.13632	0.831677
ECs0637	6787.59	-0.150406	0.24843	-0.605426	0.544896	0.980199
ECs0638	501.104	-0.679217	0.317039	-2.14238	0.0321631	0.515059
ECs0639	372.115	-0.710716	0.323008	-2.2003	0.0277854	0.48623
ECs0640	151.872	0.0412139	0.267138	0.15428	0.877389	0.993106
ECs0641	67.1149	0.0704058	0.299389	0.235165	0.814081	0.986053
ECs0642	9.97998	0.133743	0.331781	0.403107	0.68687	NA
ECs0643	394.612	0.202518	0.266379	0.760263	0.447097	0.980199
ECs0644	42682.9	-0.348899	0.235232	-1.48322	0.138017	0.831677
ECs0645	2710.47	-0.074822	0.240387	-0.311256	0.755606	0.983458
ECs0646	10847.5	-0.37369	0.284218	-1.3148	0.188576	0.861392
ECs0647	647.631	-0.635418	0.242314	-2.62229	0.00873408	0.263172
ECs0648	104.911	-0.544078	0.277597	-1.95995	0.0500013	0.610118
ECs0649	996.036	0.553298	0.265645	2.08284	0.0372654	0.54529
ECs0650	591.331	-0.0804152	0.256343	-0.313701	0.753748	0.983458
ECs0651	46.1042	0.368379	0.319292	1.15374	0.248607	0.920012
ECs0652	1.52975	0.00382704	0.204481	0.0187159	0.985068	NA
ECs0653	4.84474	0.0660156	0.312632	0.211161	0.832762	NA
ECs0654	9.32879	-0.437942	0.338263	-1.29468	0.195431	NA
ECs0655	1.42234	-0.0619166	0.191478	-0.323361	0.746422	NA
ECs0656	0.609547	-0.0454519	0.123163	-0.369039	0.712098	NA
ECs0657	1.08511	-0.0763749	0.150151	-0.508653	0.610995	NA
ECs0658	153.771	-0.0515125	0.266797	-0.193078	0.846898	0.990306
ECs0659	47.0576	-0.183848	0.308813	-0.595338	0.551617	0.980199
ECs0660	555.201	-0.56886	0.334779	-1.69921	0.0892792	0.742103
ECs0661	342.394	0.538143	0.296069	1.81762	0.0691216	0.692923
ECs0662	6688.2	-0.332075	0.252235	-1.31653	0.187997	0.860168
ECs0663	116.296	-0.199551	0.289082	-0.69029	0.490012	0.980199
ECs0664	1141.87	-0.176838	0.271047	-0.652425	0.514127	0.980199
ECs0665	2186.16	-0.0915399	0.234165	-0.39092	0.695856	0.982645
ECs0666	1081.22	0.0834013	0.274606	0.303713	0.761347	0.983458
ECs0667	27.5148	-0.0993584	0.33471	-0.296849	0.766582	0.983458
ECs0668	179.469	0.0748154	0.262682	0.284813	0.775787	0.985081
ECs0669	1458.48	-0.0815382	0.285777	-0.285321	0.775398	0.985081
ECs0670	743.21	0.363622	0.290737	1.25069	0.211048	0.887855
ECs0671	1781.34	0.233956	0.237951	0.98321	0.325504	0.980199
ECs0672	865.192	0.12651	0.246673	0.512864	0.608047	0.980199
ECs0673	505.358	0.34876	0.306671	1.13724	0.255436	0.927655
ECs0674	243.461	0.401296	0.273835	1.46547	0.142794	0.833473
ECs0675	335.489	0.425588	0.275021	1.54748	0.121748	0.807444
ECs0676	230.415	0.509825	0.268139	1.90135	0.057256	0.642727
ECs0677	541.872	0.282134	0.257247	1.09674	0.272753	0.946604
ECs0678	934.527	0.190657	0.241709	0.788787	0.430237	0.980199
ECs0679	3422.84	0.0249474	0.241837	0.103158	0.917838	0.996956
ECs0680	7381.16	0.0430559	0.243933	0.176507	0.859896	0.992007
ECs0681	10494.3	-0.349885	0.285198	-1.22682	0.219892	0.897783
ECs0682	57.9619	-0.0259843	0.301602	-0.0861541	0.931344	0.999269
ECs0683	4.13956	0.314072	0.274866	1.14264	0.253189	NA
ECs0684	9.88472	0.389242	0.3391	1.14787	0.251024	NA
ECs0685	3.57588	-0.0905131	0.281656	-0.321361	0.747937	NA
ECs0686	9.57721	0.226376	0.33711	0.671522	0.501888	NA
ECs0689	36.4193	0.122192	0.331931	0.368125	0.71278	0.983458
ECs0690	854.537	0.159583	0.25228	0.632561	0.527021	0.980199
ECs0691	820.446	0.400444	0.292694	1.36813	0.171271	0.853834
ECs0692	438.723	0.584841	0.30645	1.90844	0.0563345	0.641141
ECs0693	329.91	0.573292	0.302937	1.89245	0.0584314	0.648092
ECs0694	4037.99	0.531464	0.3033	1.75227	0.0797269	0.71792
ECs0695	840.728	0.437755	0.260971	1.67741	0.0934625	0.751423
ECs0696	4357.19	-0.155313	0.268681	-0.578057	0.563225	0.980199
ECs0697	2490.67	-0.137687	0.259263	-0.531071	0.59537	0.980199
ECs0698	5871.53	-0.209464	0.258674	-0.80976	0.418078	0.980199
ECs0699	828.502	0.503945	0.2853	1.76637	0.0773334	0.711915
ECs0700	1984.23	-0.358692	0.28198	-1.27205	0.203356	0.876995
ECs0704	1190.81	0.405485	0.295606	1.3717	0.170155	0.853573
ECs0705	472.384	0.378861	0.250396	1.51305	0.130267	0.826099
ECs0706	2402.93	0.413849	0.233781	1.77024	0.0766868	0.711915
ECs0707	3553.18	0.418739	0.234116	1.7886	0.0736798	0.703533
ECs0708	4506.81	-0.0253915	0.249219	-0.101884	0.918848	0.997234
ECs0709	2526.44	-0.146654	0.238289	-0.615445	0.538261	0.980199
ECs0710	1612.07	0.243342	0.266047	0.914656	0.360372	0.980199
ECs0713	8.47591	-0.483242	0.333655	-1.44833	0.147525	NA
ECs0714	1510.04	0.114567	0.247492	0.462913	0.643427	0.980199
ECs0715	625.641	0.0478428	0.244444	0.195721	0.844829	0.990306
ECs0716	36.0753	-0.196157	0.321233	-0.610639	0.541439	0.980199
ECs0717	281.174	0.0126661	0.268127	0.047239	0.962323	0.999269
ECs0718	1077.78	0.246226	0.268294	0.917745	0.358752	0.980199
ECs0719	5778.74	0.217805	0.275928	0.789355	0.429904	0.980199
ECs0720	1137.83	-0.837977	0.316101	-2.65098	0.00802582	0.251354
ECs0721	1410.7	-0.792336	0.322322	-2.45821	0.0139631	0.345682
ECs0722	244.666	-0.31803	0.283108	-1.12335	0.261288	0.937305
ECs0723	1123.85	-0.0547487	0.243988	-0.224391	0.822453	0.988497
ECs0724	188.18	0.227399	0.284053	0.80055	0.423392	0.980199
ECs0725	297.808	0.394695	0.294568	1.33991	0.180274	0.856477
ECs0726	177.315	0.892507	0.326129	2.73667	0.0062065	0.216991
ECs0727	7.5879	0.645157	0.312022	2.06766	0.0386717	NA
ECs0728	1391.57	0.0783324	0.335334	0.233595	0.815299	0.986149
ECs0729	286.426	0.0875793	0.251412	0.348349	0.727578	0.983458
ECs0730	24.2003	-0.143857	0.338644	-0.424804	0.67098	0.982127
ECs0731	32.4709	0.0427432	0.333475	0.128175	0.898011	0.993106
ECs0732	2192.22	-0.125103	0.246579	-0.507355	0.611906	0.980199
ECs0733	2556.03	0.186669	0.234243	0.796901	0.425508	0.980199
ECs0734	85.3684	0.141002	0.285699	0.493532	0.621637	0.980199
ECs0735	2164.35	0.229338	0.234763	0.976889	0.328624	0.980199
ECs0736	2139.72	0.180293	0.238183	0.756955	0.449077	0.980199
ECs0737	3038.1	0.106823	0.248872	0.429227	0.667758	0.98052
ECs0738	1216.24	0.0565289	0.260406	0.21708	0.828146	0.9891
ECs0739	393.315	0.480064	0.249423	1.9247	0.0542673	0.629226
ECs0740	163.781	-0.31661	0.315774	-1.00265	0.316032	0.976206
ECs0741	15.9163	-0.430543	0.341748	-1.25983	0.207732	NA
ECs0742	6.00329	-0.129255	0.319895	-0.404054	0.686173	NA
ECs0743	40.5519	-0.158506	0.314152	-0.504551	0.613874	0.980199
ECs0744	52.7407	0.567515	0.310547	1.82747	0.067629	0.688312
ECs0745	8209.43	-0.178261	0.306358	-0.58187	0.560654	0.980199
ECs0746	1436.93	0.471049	0.320977	1.46755	0.142227	0.832993
ECs0747	1159.36	0.241504	0.313208	0.771066	0.440668	0.980199
ECs0748	13819.4	-0.214009	0.253258	-0.845024	0.398098	0.980199
ECs0749	12021.6	-0.283174	0.24797	-1.14197	0.253468	0.92689
ECs0750	2210.87	-0.264561	0.250285	-1.05704	0.290492	0.958175
ECs0751	20964.4	-0.414547	0.239019	-1.73437	0.0828528	0.728342
ECs0752	13110	-0.491454	0.240984	-2.03937	0.0414135	0.570604
ECs0753	19549.9	-0.174736	0.255077	-0.685031	0.493324	0.980199
ECs0754	21572.3	-0.200294	0.251965	-0.794927	0.426656	0.980199
ECs0755	34.8543	0.201016	0.322426	0.623448	0.53299	0.980199
ECs0756	18.0333	0.0831958	0.339954	0.244727	0.806668	NA
ECs0757	26.8187	0.230596	0.337643	0.682956	0.494634	0.980199
ECs0758	4.92175	-0.0921562	0.309648	-0.297616	0.765996	NA
ECs0759	8.89414	-0.316891	0.337059	-0.940167	0.347132	NA
ECs0760	59.2532	-0.0775193	0.301224	-0.257348	0.79691	0.985586
ECs0761	68.8533	-0.00821714	0.30342	-0.0270817	0.978395	0.999269
ECs0762	28.8604	0.307291	0.333176	0.922307	0.356369	0.980199
ECs0763	20.8021	-0.13788	0.341159	-0.404151	0.686102	0.982645
ECs0764	5.10776	0.0918403	0.313272	0.293165	0.769396	NA
ECs0766	0.238483	-0.041441	0.111479	-0.371739	0.710087	NA
ECs0767	6.08469	-0.0495826	0.321183	-0.154375	0.877314	NA
ECs0768	25536.9	-0.751375	0.278235	-2.70051	0.00692334	0.228122
ECs0769	27402.3	-0.84862	0.299347	-2.8349	0.00458394	0.177865
ECs0770	2647.88	-0.726357	0.280771	-2.58701	0.00968139	0.284236
ECs0771	302.304	-0.0477897	0.250608	-0.190695	0.848764	0.990306
ECs0772	407.836	0.124203	0.27617	0.449734	0.652902	0.980199
ECs0773	404.912	0.15875	0.279122	0.568747	0.569528	0.980199
ECs0774	1361.69	-0.0651176	0.242393	-0.268644	0.788203	0.985586
ECs0775	7432.23	0.153841	0.248447	0.61921	0.535778	0.980199
ECs0776	9657.65	-0.10993	0.241769	-0.454691	0.649332	0.980199
ECs0777	3271.07	0.0382576	0.239973	0.159424	0.873335	0.993106
ECs0778	769.715	0.586724	0.316155	1.85581	0.0634803	0.666834
ECs0779	1154.14	0.351095	0.269149	1.30447	0.192075	0.861695
ECs0780	405.935	-0.0838895	0.257498	-0.325787	0.744586	0.983458
ECs0781	7894.05	-0.289766	0.278369	-1.04094	0.297902	0.961507
ECs0782	684.144	0.0584071	0.240677	0.242679	0.808254	0.985698
ECs0783	15469.4	-0.216025	0.237664	-0.908954	0.363374	0.980199
ECs0784	4199.49	0.290695	0.275064	1.05683	0.290591	0.958175
ECs0785	2757.28	0.0595099	0.244413	0.243481	0.807633	0.985621
ECs0786	1102.82	-0.238393	0.245424	-0.97135	0.331374	0.980199
ECs0787	1171.98	-0.126685	0.242072	-0.523335	0.600741	0.980199
ECs0788	285.442	0.502232	0.292513	1.71696	0.0859864	0.740761
ECs0789	281.89	-0.016845	0.256058	-0.0657857	0.947548	0.999269
ECs0790	148.011	-0.042642	0.279809	-0.152397	0.878874	0.993106
ECs0791	420.904	0.00299368	0.268654	0.0111432	0.991109	0.999269
ECs0792	186.366	0.0929968	0.277897	0.334644	0.737893	0.983458
ECs0793	237.123	0.313165	0.255484	1.22577	0.220285	0.897783
ECs0794	173.647	0.17269	0.295371	0.584655	0.55878	0.980199
ECs0795	11136.5	-0.177022	0.246869	-0.717069	0.473332	0.980199
ECs0796	19.4297	0.387071	0.341724	1.1327	0.25734	NA
ECs0797	1.71817	0.206135	0.220563	0.934586	0.350001	NA
ECs0798	4.5739	-0.0929817	0.286676	-0.324344	0.745678	NA
ECs0799	57.6014	-0.203179	0.305541	-0.664982	0.506062	0.980199
ECs0800	538.416	0.422563	0.312646	1.35157	0.176512	0.85464
ECs0801	11.2541	-0.567284	0.340743	-1.66484	0.0959438	NA
ECs0802	1.00462	0.052563	0.161234	0.326005	0.744421	NA
ECs0804	26.0477	0.215061	0.333481	0.644897	0.518994	0.980199
ECs0805	14.3693	0.13918	0.341396	0.40768	0.683509	NA
ECs0806	2.81598	0.106287	0.269551	0.394311	0.693351	NA
ECs0807	1.73041	-0.0581408	0.226972	-0.256159	0.797828	NA
ECs0808	4.70638	0.0725504	0.30115	0.240911	0.809624	NA
ECs0809	36.8736	0.0664253	0.318086	0.208828	0.834582	0.989762
ECs0810	1.4635	0.136802	0.218872	0.62503	0.531951	NA
ECs0811	0.13258	0.0111106	0.111479	0.0996654	0.92061	NA
ECs0812	8.57425	-0.183871	0.328144	-0.560335	0.575251	NA
ECs0813	18.259	-0.435539	0.341256	-1.27628	0.201856	NA
ECs0814	188.135	0.687795	0.288675	2.38259	0.0171913	0.379255
ECs0815	241.9	-0.328588	0.283584	-1.1587	0.246579	0.918745
ECs0816	110.677	0.252905	0.299468	0.844516	0.398381	0.980199
ECs0818	6.21647	0.110296	0.322258	0.342259	0.732156	NA
ECs0819	11.4731	-0.238117	0.337238	-0.706078	0.480139	NA
ECs0820	11.4419	-0.139426	0.340631	-0.409318	0.682306	NA
ECs0822	6.17136	-0.0544912	0.302146	-0.180347	0.85688	NA
ECs0823	0.988279	0.0940819	0.167343	0.562211	0.573972	NA
ECs0824	19.4682	-0.30191	0.338278	-0.892491	0.37213	NA
ECs0825	62.9329	-0.277142	0.305681	-0.90664	0.364597	0.980199
ECs0826	18.192	-0.0873037	0.338768	-0.257709	0.796631	NA
ECs0827	51.4767	-0.0930685	0.305949	-0.304196	0.760979	0.983458
ECs0828	4.64407	0.208556	0.301538	0.691641	0.489163	NA
ECs0829	78.1806	0.0175198	0.288233	0.0607835	0.951532	0.999269
ECs0830	31.1503	-0.413435	0.326605	-1.26586	0.205564	0.883194
ECs0831	26.7407	0.0593289	0.32906	0.180298	0.856919	0.991575
ECs0832	49.2999	-0.291234	0.305622	-0.952921	0.34063	0.980199
ECs0833	68.2159	-0.00114933	0.302135	-0.00380403	0.996965	0.999269
ECs0834	197.485	-0.157953	0.271014	-0.582822	0.560013	0.980199
ECs0835	22.4468	-0.173749	0.338319	-0.513566	0.607555	0.980199
ECs0836	16.882	-0.146427	0.340407	-0.430153	0.667084	NA
ECs0837	158.473	-0.269174	0.267262	-1.00715	0.313861	0.976206
ECs0838	23.01	-0.188334	0.336288	-0.560038	0.575454	0.980199
ECs0839	29.5834	-0.0772636	0.331342	-0.233184	0.815619	0.986149
ECs0840	7.73795	0.407412	0.331741	1.2281	0.21941	NA
ECs0841	10.2871	-0.0744349	0.338577	-0.219846	0.825991	NA
ECs0842	227.813	-0.103051	0.271171	-0.380022	0.703929	0.983002
ECs0843	16.3926	-0.214358	0.341286	-0.628089	0.529945	NA
ECs0844	22.8343	-0.531038	0.337751	-1.57228	0.115886	0.807444
ECs0845	49.9046	-0.583523	0.307093	-1.90015	0.0574131	0.642915
ECs0846	50.9017	0.217069	0.311045	0.697868	0.485259	0.980199
ECs0847	76.5437	0.053802	0.294679	0.182579	0.855129	0.991575
ECs0848	15.5908	0.233621	0.341307	0.68449	0.493666	NA
ECs0849	10.2805	0.287532	0.340025	0.845619	0.397765	NA
ECs0850	138.978	0.0785431	0.278477	0.282045	0.777909	0.985081
ECs0851	4296.77	-0.0955312	0.259389	-0.368293	0.712655	0.983458
ECs0852	382.423	1.13318	0.317386	3.57037	0.000356476	0.027211
ECs0853	827.686	1.17444	0.322925	3.63689	0.000275954	0.0221731
ECs0854	666.676	1.23025	0.319861	3.84621	0.00011996	0.0119438
ECs0855	389.827	1.24256	0.30779	4.03705	5.41271e-05	0.0060464
ECs0856	355.101	1.04435	0.315079	3.31457	0.000917847	0.0600534
ECs0857	3415.57	0.109795	0.247663	0.443325	0.657531	0.980199
ECs0858	294.654	0.386414	0.264665	1.46001	0.144287	0.836501
ECs0859	1055.65	0.094664	0.261995	0.36132	0.71786	0.983458
ECs0860	2493.88	0.100041	0.263301	0.379948	0.703984	0.983002
ECs0861	1728.05	-0.0334557	0.277219	-0.120683	0.903942	0.993106
ECs0862	702.477	-0.0667853	0.288604	-0.231409	0.816997	0.986999
ECs0863	893.655	-0.0338011	0.278468	-0.121382	0.903388	0.993106
ECs0864	4186.39	-0.128165	0.272967	-0.469526	0.638694	0.980199
ECs0865	10.9768	-0.00289291	0.339765	-0.00851443	0.993207	NA
ECs0866	442.517	-0.122602	0.255974	-0.478962	0.631966	0.980199
ECs0867	897.01	0.031815	0.2491	0.127719	0.898371	0.993106
ECs0868	562.819	0.146034	0.267325	0.546281	0.584873	0.980199
ECs0869	1115.31	-0.155156	0.267951	-0.579046	0.562558	0.980199
ECs0870	901.534	-0.318138	0.254317	-1.25095	0.210954	0.887855
ECs0871	904.588	-0.261116	0.245524	-1.06351	0.287552	0.958175
ECs0872	1631.26	-0.144473	0.237408	-0.608541	0.542829	0.980199
ECs0873	1503.26	-0.0520101	0.252911	-0.205646	0.837068	0.989762
ECs0874	276.209	-0.0545342	0.253467	-0.215153	0.829648	0.9891
ECs0875	107.378	0.0257629	0.294064	0.0876097	0.930187	0.999269
ECs0876	15.8191	0.0585108	0.340984	0.171594	0.863756	NA
ECs0877	427.353	-0.0580204	0.247239	-0.234673	0.814463	0.986053
ECs0878	2206.06	-0.390812	0.265711	-1.47082	0.14134	0.831677
ECs0879	1923.32	0.0678085	0.242055	0.280137	0.779373	0.985081
ECs0880	250.056	-0.80028	0.310674	-2.57595	0.00999644	0.28977
ECs0881	3069.14	-0.256618	0.296276	-0.866146	0.38641	0.980199
ECs0882	82.0407	0.245244	0.291253	0.84203	0.399771	0.980199
ECs0883	49.9524	0.272437	0.312817	0.870913	0.383801	0.980199
ECs0884	480.142	-0.188648	0.2969	-0.635394	0.525172	0.980199
ECs0885	155.124	0.137168	0.26878	0.510335	0.609817	0.980199
ECs0886	839.88	-0.00152564	0.247724	-0.00615862	0.995086	0.999269
ECs0887	724.194	0.226563	0.275047	0.823727	0.410095	0.980199
ECs0888	610.257	-0.00400664	0.261604	-0.0153157	0.98778	0.999269
ECs0889	8092.77	0.00273228	0.252497	0.010821	0.991366	0.999269
ECs0890	209668	-0.312253	0.287069	-1.08773	0.276715	0.951466
ECs0891	83.3655	0.0110364	0.297113	0.0371454	0.970369	0.999269
ECs0892	21852.1	0.447428	0.257432	1.73804	0.0822036	0.726819
ECs0893	42.8932	0.057643	0.313047	0.184135	0.853907	0.991575
ECs0894	403.435	-0.0798696	0.250156	-0.319279	0.749515	0.983458
ECs0895	191.852	-0.106583	0.265875	-0.400877	0.688511	0.982645
ECs0896	594.499	-0.0644436	0.260994	-0.246916	0.804973	0.985586
ECs0897	949.414	0.566055	0.299596	1.8894	0.0588385	0.648092
ECs0898	2927.96	0.116855	0.235953	0.495245	0.620427	0.980199
ECs0899	105.441	-0.0776747	0.2815	-0.275932	0.7826	0.985586
ECs0902	82.7798	-0.231637	0.328639	-0.704838	0.480911	0.980199
ECs0903	192.074	0.0153432	0.275265	0.0557399	0.955549	0.999269
ECs0904	381.232	-0.000543303	0.248509	-0.00218625	0.998256	0.999269
ECs0905	655.671	0.0339396	0.247849	0.136937	0.891081	0.993106
ECs0908	760.664	-0.315178	0.246869	-1.2767	0.201706	0.87491
ECs0909	992.096	-0.373208	0.265339	-1.40653	0.159566	0.844208
ECs0910	323.376	-0.400361	0.270663	-1.47919	0.13909	0.831677
ECs0911	148.883	-0.0569374	0.278673	-0.204316	0.838106	0.989762
ECs0912	57.0947	0.0109232	0.321328	0.0339939	0.972882	0.999269
ECs0913	12.2354	-0.065557	0.340054	-0.192784	0.847128	NA
ECs0914	1.84946	-0.0193645	0.229036	-0.0845475	0.932621	NA
ECs0915	216.883	0.352977	0.291693	1.2101	0.226241	0.908138
ECs0916	10067.1	-0.513474	0.323116	-1.58913	0.11203	0.799218
ECs0917	1065.01	0.219511	0.244583	0.897489	0.369458	0.980199
ECs0918	1512.24	-0.240486	0.239075	-1.0059	0.314463	0.976206
ECs0919	6928.5	0.588894	0.253453	2.32348	0.0201532	0.407697
ECs0920	528.105	0.993182	0.283241	3.5065	0.000454048	0.033541
ECs0921	545.776	1.75094	0.262048	6.68177	2.36081e-11	1.35156e-08
ECs0922	204.769	0.571018	0.276822	2.06277	0.0391348	0.561701
ECs0923	32.7253	0.11038	0.322042	0.342749	0.731787	0.983458
ECs0924	211.452	0.108632	0.275667	0.394069	0.69353	0.982645
ECs0925	152.403	0.136034	0.267911	0.507758	0.611623	0.980199
ECs0926	132.485	0.0332228	0.283519	0.11718	0.906717	0.993106
ECs0927	412.791	0.219622	0.251284	0.873998	0.382119	0.980199
ECs0928	91.9593	-0.143417	0.318248	-0.450645	0.652246	0.980199
ECs0929	118.972	-0.0846894	0.303676	-0.278881	0.780336	0.985081
ECs0930	347.432	0.147134	0.253835	0.579643	0.562155	0.980199
ECs0931	815.22	0.32614	0.250545	1.30172	0.193011	0.86326
ECs0932	621.494	0.101467	0.242143	0.419038	0.675189	0.982639
ECs0933	266.431	0.163652	0.270124	0.605841	0.54462	0.980199
ECs0934	1348.64	0.317346	0.239481	1.32514	0.185124	0.856477
ECs0935	456.545	0.156122	0.259846	0.600827	0.547955	0.980199
ECs0936	284.909	0.16284	0.257537	0.632299	0.527191	0.980199
ECs0937	327.632	0.13192	0.249692	0.528332	0.597269	0.980199
ECs0938	73.701	0.062048	0.290774	0.213389	0.831023	0.9891
ECs0939	99.8713	0.193803	0.302361	0.640967	0.521544	0.980199
ECs0940	14.766	0.142427	0.341637	0.416896	0.676754	NA
ECs0941	22.8205	0.344536	0.339893	1.01366	0.310745	0.97454
ECs0942	198.523	-0.155618	0.271948	-0.572236	0.567162	0.980199
ECs0943	279.493	0.48049	0.294327	1.63251	0.102573	0.785857
ECs0944	1211.12	0.257264	0.24154	1.0651	0.28683	0.958175
ECs0945	1048.29	0.134703	0.238385	0.565068	0.572028	0.980199
ECs0946	4794.06	0.187171	0.234766	0.797265	0.425297	0.980199
ECs0947	1987.47	-0.016723	0.240231	-0.0696119	0.944503	0.999269
ECs0948	7603.43	-0.370233	0.250943	-1.47536	0.140115	0.831677
ECs0951	0.187619	0.0317559	0.111735	0.284207	0.776252	NA
ECs0952	1176.05	-0.0778678	0.250104	-0.311342	0.755541	0.983458
ECs0953	1518.38	0.000623432	0.251231	0.00248151	0.99802	0.999269
ECs0954	179.9	0.24568	0.265945	0.923801	0.35559	0.980199
ECs0955	784.972	0.0637325	0.248419	0.256552	0.797525	0.985586
ECs0956	3116.83	0.0226012	0.24781	0.091204	0.927331	0.9991
ECs0957	16154.6	0.0125934	0.254221	0.0495371	0.960491	0.999269
ECs0958	72.086	-0.179355	0.336294	-0.533329	0.593806	0.980199
ECs0959	191.246	-0.629545	0.328997	-1.91353	0.0556804	0.639226
ECs0960	35.8149	0.31729	0.326679	0.971261	0.331419	0.980199
ECs0961	280.876	-0.203501	0.267672	-0.760264	0.447097	0.980199
ECs0962	971.246	-0.294257	0.255702	-1.15078	0.249822	0.921098
ECs0963	2952.5	0.786164	0.270024	2.91146	0.00359749	0.158428
ECs0964	249.471	-0.454941	0.254538	-1.78732	0.0738864	0.703533
ECs0965	640.067	-0.252828	0.257522	-0.98177	0.326213	0.980199
ECs0966	15607.2	-0.117518	0.246508	-0.476731	0.633554	0.980199
ECs0967	1618.95	-0.178305	0.260234	-0.685173	0.493235	0.980199
ECs0968	15958.4	-0.259453	0.25367	-1.0228	0.306404	0.971732
ECs0969	411.231	0.133951	0.255508	0.524253	0.600103	0.980199
ECs0970	242.255	-0.00621069	0.259504	-0.0239329	0.980906	0.999269
ECs0971	1239.65	-0.337154	0.248744	-1.35542	0.175282	0.854378
ECs0972	564.352	0.164995	0.261311	0.631413	0.52777	0.980199
ECs0973	2610.88	0.372416	0.287938	1.29339	0.195876	0.869295
ECs0974	1903.35	0.202503	0.260835	0.776365	0.437534	0.980199
ECs0975	6860.13	-0.0691692	0.232682	-0.29727	0.766261	0.983458
ECs0976	1832.87	-0.526954	0.256441	-2.05487	0.0398915	0.565459
ECs0977	755.871	-0.067462	0.247671	-0.272386	0.785326	0.985586
ECs0978	7498.7	0.103408	0.244966	0.422132	0.672928	0.982639
ECs0979	2990.58	-0.954281	0.33265	-2.86873	0.00412129	0.167199
ECs0980	915.994	-0.977821	0.33738	-2.89828	0.00375217	0.161173
ECs0981	1030.08	-1.00253	0.330565	-3.03277	0.00242324	0.123316
ECs0982	49347.4	-0.421506	0.306957	-1.37317	0.169698	0.853573
ECs0983	112.469	-0.140383	0.275854	-0.508903	0.61082	0.980199
ECs0984	342.833	0.271839	0.317401	0.856454	0.391747	0.980199
ECs0985	1228.97	-0.362027	0.270355	-1.33908	0.180544	0.856477
ECs0986	47433.3	-0.514033	0.251656	-2.0426	0.0410916	0.568732
ECs0987	3172.72	-0.313218	0.245549	-1.27558	0.202103	0.87491
ECs0988	460.306	0.391297	0.293175	1.33469	0.181979	0.856477
ECs0989	993.062	0.127977	0.237533	0.538776	0.590041	0.980199
ECs0990	1920.99	0.422433	0.278564	1.51647	0.129401	0.825428
ECs0991	628.406	0.462558	0.309767	1.49324	0.135373	0.831677
ECs0992	27.4614	0.00153397	0.333439	0.00460045	0.996329	0.999269
ECs0993	1177.21	0.0669093	0.258153	0.259184	0.795493	0.985586
ECs0994	33168.3	0.28226	0.300468	0.939402	0.347524	0.980199
ECs0995	7739.34	-0.356637	0.258882	-1.3776	0.168326	0.853573
ECs0996	180.381	-0.0559008	0.278747	-0.200543	0.841056	0.989814
ECs0997	969.978	0.339972	0.287978	1.18055	0.237783	0.914863
ECs0998	446.227	0.0861449	0.246854	0.348971	0.727111	0.983458
ECs0999	260.517	0.079043	0.261201	0.302614	0.762184	0.983458
ECs1000	253.411	-0.138115	0.256753	-0.537929	0.590626	0.980199
ECs1001	692.022	-0.266439	0.242833	-1.09721	0.272549	0.946604
ECs1002	2479.07	-0.447876	0.318781	-1.40497	0.160031	0.844208
ECs1003	96.4583	0.00686429	0.293884	0.0233571	0.981365	0.999269
ECs1004	328.279	0.0555818	0.258078	0.215368	0.82948	0.9891
ECs1005	608.137	0.174718	0.279404	0.625322	0.53176	0.980199
ECs1006	737.36	0.00828439	0.248642	0.0333185	0.973421	0.999269
ECs1007	5099.02	-0.136117	0.236718	-0.575018	0.565279	0.980199
ECs1008	5778.84	-0.156887	0.272809	-0.575081	0.565237	0.980199
ECs1009	1207.61	0.353633	0.258229	1.36945	0.170857	0.853834
ECs1010	694.07	0.536788	0.294958	1.81988	0.0687777	0.692311
ECs1011	10514.5	0.253078	0.280074	0.903611	0.366202	0.980199
ECs1012	1761.5	0.0144618	0.273876	0.0528041	0.957888	0.999269
ECs1013	2323.23	0.516509	0.301476	1.71327	0.0866634	0.740761
ECs1014	1104.81	0.390322	0.299976	1.30118	0.193198	0.86326
ECs1015	7863.17	0.0585497	0.2467	0.237331	0.8124	0.986053
ECs1016	95.0045	0.018044	0.281418	0.0641184	0.948876	0.999269
ECs1017	37.1719	0.00542308	0.32386	0.0167452	0.98664	0.999269
ECs1018	49.3021	-0.159629	0.308392	-0.517617	0.604725	0.980199
ECs1019	18.4753	0.0515928	0.338505	0.152414	0.878861	NA
ECs1020	6.08396	-0.196809	0.324039	-0.607362	0.543611	NA
ECs1021	40.4151	0.204784	0.318028	0.643918	0.519628	0.980199
ECs1022	6.22741	0.296708	0.313848	0.945389	0.344461	NA
ECs1025	30.1256	0.00351259	0.336036	0.010453	0.99166	0.999269
ECs1026	2.5551	-0.0542744	0.266138	-0.203933	0.838406	NA
ECs1027	9.29988	-0.119697	0.336938	-0.355249	0.722403	NA
ECs1028	16.3203	0.0965133	0.341869	0.282311	0.777705	NA
ECs1029	343.108	0.931105	0.300691	3.09655	0.00195788	0.110013
ECs1030	633.777	0.0435784	0.243082	0.179274	0.857722	0.991597
ECs1031	271.293	0.49461	0.299464	1.65165	0.0986056	0.768051
ECs1032	947.213	0.183966	0.287827	0.639153	0.522723	0.980199
ECs1033	1347.97	0.0944917	0.241996	0.390468	0.69619	0.982645
ECs1034	654.757	-0.175779	0.247811	-0.709327	0.478121	0.980199
ECs1035	1698.56	-0.10479	0.239083	-0.438299	0.661169	0.980199
ECs1036	1035.54	-0.39283	0.269186	-1.45932	0.144477	0.83654
ECs1037	24802.7	-0.38181	0.298437	-1.27936	0.200769	0.874069
ECs1038	882.33	0.0591432	0.256737	0.230365	0.817808	0.987079
ECs1039	1303.26	-0.0501779	0.240303	-0.208811	0.834596	0.989762
ECs1040	284.415	-0.269356	0.302543	-0.890306	0.373301	0.980199
ECs1041	341740	0.0641962	0.242066	0.265201	0.790854	0.985586
ECs1042	533.117	0.0662922	0.261178	0.25382	0.799635	0.985586
ECs1043	300.425	-0.148592	0.258834	-0.574082	0.565913	0.980199
ECs1044	343.937	0.0576272	0.263093	0.219037	0.826621	0.9891
ECs1045	48.971	0.168577	0.316694	0.532302	0.594517	0.980199
ECs1046	1678.98	-0.189955	0.240493	-0.789856	0.429612	0.980199
ECs1047	790.874	-0.00991755	0.247381	-0.0400901	0.968021	0.999269
ECs1048	230.455	-0.441979	0.317332	-1.3928	0.163681	0.844208
ECs1049	2219.47	-0.196769	0.261827	-0.751522	0.452338	0.980199
ECs1050	5883.34	-0.255084	0.295494	-0.863247	0.388002	0.980199
ECs1051	975.006	-0.143001	0.265258	-0.5391	0.589818	0.980199
ECs1052	674.135	-0.213523	0.263443	-0.810507	0.417649	0.980199
ECs1053	175.473	0.136299	0.271502	0.502019	0.615654	0.980199
ECs1054	2038.5	0.510904	0.279514	1.82783	0.0675748	0.688312
ECs1055	108.572	-0.115214	0.278931	-0.413055	0.679567	0.982645
ECs1057	86.6944	0.0127016	0.289855	0.0438205	0.965048	0.999269
ECs1058	4.68707	-0.337128	0.309826	-1.08812	0.276541	NA
ECs1059	4.10297	-0.000343648	0.280617	-0.00122462	0.999023	NA
ECs1060	3.20414	0.142047	0.261565	0.543066	0.587085	NA
ECs1061	3.41272	0.26149	0.260599	1.00342	0.315659	NA
ECs1063	13.6356	-0.228903	0.341917	-0.66947	0.503196	NA
ECs1065	22.1179	-0.183859	0.335717	-0.547662	0.583924	0.980199
ECs1067	1975.33	-0.248239	0.247813	-1.00172	0.31648	0.976206
ECs1068	1316.83	-0.27979	0.255796	-1.0938	0.274043	0.947257
ECs1069	1644.53	-0.222924	0.254413	-0.876228	0.380906	0.980199
ECs1070	42.1976	-0.195789	0.314304	-0.622928	0.533332	0.980199
ECs1071	67.8579	-0.23551	0.30089	-0.782713	0.433796	0.980199
ECs1072	1121.95	-0.169856	0.240697	-0.705686	0.480383	0.980199
ECs1073	168.261	0.0121048	0.276835	0.0437259	0.965123	0.999269
ECs1074	132.081	0.0122338	0.271165	0.0451156	0.964015	0.999269
ECs1075	257.458	-0.146459	0.253227	-0.578373	0.563012	0.980199
ECs1076	106.108	0.0179001	0.300799	0.0595085	0.952547	0.999269
ECs1077	31.9524	0.351978	0.332438	1.05878	0.289701	0.958175
ECs1080	10086.6	-0.112572	0.251508	-0.44759	0.654449	0.980199
ECs1081	14.101	0.0415664	0.341718	0.12164	0.903184	NA
ECs1082	9.12381	0.282613	0.335195	0.84313	0.399156	NA
ECs1083	1.40583	-0.150774	0.216838	-0.695331	0.486848	NA
ECs1084	5.23427	-0.0355847	0.273655	-0.130035	0.896539	NA
ECs1085	246.771	0.384521	0.264349	1.45459	0.145782	0.837741
ECs1087	385.803	-0.0353703	0.255638	-0.138361	0.889955	0.993106
ECs1088	264.96	-0.098218	0.253029	-0.38817	0.697891	0.982645
ECs1089	124.981	-0.176783	0.271332	-0.651539	0.514698	0.980199
ECs1090	304.963	0.0113811	0.256869	0.044307	0.96466	0.999269
ECs1093	28.8854	-0.0275658	0.331147	-0.0832431	0.933658	0.999269
ECs1094	0.0938095	0.0111106	0.111479	0.0996654	0.92061	NA
ECs1096	11.7639	-0.167593	0.340795	-0.491769	0.622882	NA
ECs1097	48.9879	-0.106306	0.305966	-0.347445	0.728257	0.983458
ECs1098	7.45432	-0.249909	0.331036	-0.75493	0.450291	NA
ECs1099	9.08679	0.0244632	0.336028	0.0728011	0.941964	NA
ECs1100	5.85374	-0.194642	0.321055	-0.606256	0.544345	NA
ECs1101	20.9316	-0.0860648	0.336805	-0.255533	0.798312	0.985586
ECs1102	18.4979	0.0955911	0.339096	0.2819	0.77802	NA
ECs1103	12.9226	-0.255806	0.341877	-0.748241	0.454315	NA
ECs1104	94.6166	0.0829121	0.280494	0.295593	0.767541	0.983586
ECs1106	113.477	0.0560164	0.274043	0.204407	0.838035	0.989762
ECs1107	105.909	-0.0312736	0.289009	-0.108209	0.91383	0.995896
ECs1108	52.3956	-0.23076	0.315435	-0.731561	0.464436	0.980199
ECs1109	41.4364	-0.28885	0.317095	-0.910925	0.362335	0.980199
ECs1110	9.56689	-0.0838694	0.335785	-0.249771	0.802765	NA
ECs1111	40.6456	0.105222	0.316595	0.332355	0.739621	0.983458
ECs1112	31.5679	0.351835	0.32723	1.07519	0.28229	0.957515
ECs1113	21.6571	-0.0522909	0.335371	-0.15592	0.876096	0.993106
ECs1114	114.134	-0.0501005	0.278287	-0.180032	0.857127	0.991575
ECs1115	10.7172	0.0176119	0.340599	0.0517086	0.958761	NA
ECs1116	28.8571	-0.10097	0.33869	-0.298119	0.765613	0.983458
ECs1117	35.9581	0.0468938	0.324455	0.144531	0.885081	0.993106
ECs1118	61.9788	0.356659	0.297041	1.20071	0.229865	0.908511
ECs1119	30.3487	0.0500026	0.325701	0.153523	0.877986	0.993106
ECs1120	659.679	-0.124639	0.242128	-0.514762	0.606719	0.980199
ECs1121	272.006	-0.15165	0.273037	-0.55542	0.578608	0.980199
ECs1122	26.4313	0.0819405	0.333137	0.245966	0.805708	0.985586
ECs1123	41.9099	-0.229746	0.319327	-0.719468	0.471852	0.980199
ECs1124	19.1329	-0.470251	0.340343	-1.3817	0.167065	NA
ECs1125	36.1702	-0.364777	0.340382	-1.07167	0.283868	0.957941
ECs1126	51.655	-0.220819	0.32566	-0.678065	0.497731	0.980199
ECs1127	35.742	0.097681	0.338609	0.288477	0.772982	0.985081
ECs1128	2074.72	-0.924767	0.322593	-2.86667	0.00414818	0.167199
ECs1129	2435.01	-0.910798	0.325027	-2.80222	0.00507518	0.187454
ECs1130	1981.92	-0.848872	0.331127	-2.56359	0.0103596	0.296545
ECs1131	1839.94	-0.717661	0.336795	-2.13085	0.0331013	0.522344
ECs1132	827.514	-0.745446	0.335024	-2.22505	0.0260776	0.479692
ECs1133	1209.51	-0.671787	0.328905	-2.04249	0.0411027	0.568732
ECs1134	1751.31	-0.507694	0.277205	-1.83148	0.0670294	0.686789
ECs1135	1578	-0.602357	0.298531	-2.01774	0.0436187	0.577079
ECs1136	1314.5	-0.595817	0.300672	-1.98162	0.0475219	0.601509
ECs1137	1227.92	0.18971	0.264442	0.717396	0.47313	0.980199
ECs1138	565.397	-0.0779376	0.257289	-0.302919	0.761952	0.983458
ECs1139	930.692	0.12024	0.261057	0.46059	0.645093	0.980199
ECs1140	695.649	0.393627	0.311958	1.2618	0.207023	0.886134
ECs1141	98.1278	0.0376377	0.32488	0.115851	0.907771	0.993106
ECs1142	262.427	-0.129076	0.260192	-0.496079	0.619839	0.980199
ECs1143	14483.6	-0.182787	0.235115	-0.777437	0.436901	0.980199
ECs1144	1.77778	-0.0758293	0.193891	-0.391092	0.695729	NA
ECs1145	17.7675	-0.21115	0.341021	-0.619169	0.535805	NA
ECs1146	57.0321	0.0801787	0.30376	0.263954	0.791815	0.985586
ECs1147	43.1861	-0.449381	0.321838	-1.3963	0.162626	0.844208
ECs1148	143.48	-0.15558	0.289312	-0.537759	0.590743	0.980199
ECs1149	137.331	-0.010627	0.275059	-0.0386354	0.969181	0.999269
ECs1150	155.06	-0.0798088	0.265579	-0.300508	0.763789	0.983458
ECs1151	28.6226	-0.210472	0.336568	-0.625347	0.531744	0.980199
ECs1152	82.098	-0.417723	0.293787	-1.42185	0.155068	0.844208
ECs1153	25.8563	-0.731602	0.331993	-2.20367	0.0275476	0.48623
ECs1154	7016.16	0.0333798	0.285622	0.116867	0.906965	0.993106
ECs1155	20187.8	0.125275	0.273442	0.458143	0.64685	0.980199
ECs1158	10720.3	-0.465764	0.277899	-1.67602	0.0937345	0.751423
ECs1159	4359.5	-0.279088	0.26296	-1.06133	0.288538	0.958175
ECs1160	2004.68	-0.0170248	0.245652	-0.0693047	0.944747	0.999269
ECs1161	78.3473	0.304845	0.298946	1.01973	0.307856	0.971732
ECs1162	63.1403	0.539873	0.303627	1.77808	0.0753913	0.710034
ECs1163	51.9919	0.306993	0.30549	1.00492	0.314934	0.976206
ECs1164	100.682	-0.0673593	0.286008	-0.235515	0.813809	0.986053
ECs1165	71.9029	0.258703	0.293025	0.882871	0.377306	0.980199
ECs1166	34.5069	0.0940926	0.321824	0.292373	0.770002	0.985081
ECs1167	48.918	0.0860186	0.309017	0.278362	0.780735	0.985081
ECs1168	88.8694	0.106081	0.292842	0.362248	0.717167	0.983458
ECs1169	191.665	0.108657	0.263822	0.411856	0.680445	0.982645
ECs1170	69.9256	0.151924	0.291802	0.520642	0.602616	0.980199
ECs1171	71.5438	0.140577	0.294135	0.477935	0.632696	0.980199
ECs1172	86.0615	0.36065	0.288637	1.24949	0.211485	0.887855
ECs1173	27.1844	0.287562	0.330496	0.870094	0.384249	0.980199
ECs1174	98.8354	0.326104	0.29027	1.12345	0.261246	0.937305
ECs1175	263.24	0.188662	0.257345	0.73311	0.463491	0.980199
ECs1176	200.964	0.156268	0.277775	0.56257	0.573727	0.980199
ECs1177	229.889	0.129287	0.271667	0.475903	0.634144	0.980199
ECs1178	200.118	0.148799	0.284011	0.523919	0.600335	0.980199
ECs1179	371.903	0.0108005	0.269569	0.0400657	0.968041	0.999269
ECs1180	90.3835	0.0794972	0.297722	0.267019	0.789455	0.985586
ECs1181	128.234	0.0323563	0.285289	0.113416	0.909701	0.993557
ECs1182	39.0134	0.192005	0.324403	0.591873	0.553936	0.980199
ECs1183	11.9286	-0.221558	0.338023	-0.655453	0.512176	NA
ECs1184	4785.36	-0.308862	0.242266	-1.27489	0.202349	0.87491
ECs1185	2104.6	-0.191436	0.238752	-0.801822	0.422656	0.980199
ECs1186	72.4864	0.275481	0.293248	0.939414	0.347518	0.980199
ECs1187	205.903	-0.264416	0.287938	-0.918311	0.358456	0.980199
ECs1188	26.3941	-0.226972	0.334265	-0.679018	0.497127	0.980199
ECs1189	136.331	0.0774298	0.276842	0.279689	0.779716	0.985081
ECs1190	242.592	0.0772567	0.255883	0.301922	0.762711	0.983458
ECs1191	64.4484	-0.0148165	0.31017	-0.0477691	0.9619	0.999269
ECs1192	19.9455	-0.106648	0.337058	-0.316407	0.751693	NA
ECs1193	15.3894	-0.00172404	0.341601	-0.00504694	0.995973	NA
ECs1194	37.2914	-0.00345138	0.319774	-0.0107932	0.991388	0.999269
ECs1195	48.4872	0.0503755	0.306109	0.164567	0.869285	0.993106
ECs1196	27.4687	-0.199726	0.329126	-0.606836	0.54396	0.980199
ECs1197	10.5022	-0.329439	0.340283	-0.968131	0.332979	NA
ECs1199	85.2252	0.0511546	0.292524	0.174874	0.861179	0.992007
ECs1200	40.1347	0.249046	0.322859	0.771376	0.440484	0.980199
ECs1201	53.1056	0.0794017	0.309209	0.25679	0.797341	0.985586
ECs1202	33.6635	0.270381	0.321477	0.841059	0.400315	0.980199
ECs1203	41.0894	0.235502	0.317758	0.741136	0.458611	0.980199
ECs1204	957.87	0.437262	0.243009	1.79937	0.0719608	0.703533
ECs1205	0	NA	NA	NA	NA	NA
ECs1206	101.193	-0.225875	0.291161	-0.775774	0.437882	0.980199
ECs1207	425.271	-0.240704	0.247311	-0.973283	0.330412	0.980199
ECs1208	382.768	-0.147854	0.250256	-0.590809	0.554648	0.980199
ECs1209	129.413	-0.0145247	0.270956	-0.0536055	0.957249	0.999269
ECs1210	57.307	-0.0477163	0.305038	-0.156428	0.875696	0.993106
ECs1211	53.8977	-0.093158	0.30617	-0.304269	0.760923	0.983458
ECs1212	11.7178	0.277772	0.341388	0.813657	0.415841	NA
ECs1213	15.7622	0.0805917	0.341863	0.235742	0.813633	NA
ECs1214	27.0966	-0.0467162	0.329233	-0.141894	0.887164	0.993106
ECs1215	71.7165	-0.139709	0.295131	-0.47338	0.635942	0.980199
ECs1217	1010.68	0.385673	0.290138	1.32928	0.183757	0.856477
ECs1218	16.3375	-0.356267	0.341166	-1.04426	0.296363	NA
ECs1219	54.9274	-0.0258195	0.304895	-0.0846833	0.932513	0.999269
ECs1220	195.301	-0.00769517	0.275291	-0.0279528	0.9777	0.999269
ECs1221	424.883	-0.128235	0.247215	-0.518718	0.603958	0.980199
ECs1222	241.723	-0.223314	0.259408	-0.860861	0.389315	0.980199
ECs1223	482.879	-0.21993	0.248239	-0.885963	0.375638	0.980199
ECs1224	87.0582	-0.389131	0.291081	-1.33685	0.181272	0.856477
ECs1225	38.8908	-0.157532	0.316695	-0.497426	0.618889	0.980199
ECs1226	41.4738	-0.286311	0.317943	-0.900511	0.367848	0.980199
ECs1227	166.166	-0.219435	0.298351	-0.735494	0.462038	0.980199
ECs1228	380.427	-0.479605	0.252952	-1.89603	0.057956	0.647411
ECs1229	145.168	-0.621016	0.283275	-2.19227	0.0283598	0.486248
ECs1230	67.9303	-0.54924	0.295275	-1.86009	0.0628724	0.663397
ECs1231	63.3272	0.264945	0.30939	0.856348	0.391805	0.980199
ECs1232	153.01	-0.0212064	0.26944	-0.0787057	0.937267	0.999269
ECs1233	166.824	-0.0399795	0.26353	-0.151708	0.879418	0.993106
ECs1234	35.72	0.102808	0.32068	0.320593	0.748519	0.983458
ECs1235	30.0636	0.0253315	0.325995	0.0777054	0.938062	0.999269
ECs1236	413.697	0.532341	0.279563	1.90419	0.0568852	0.64171
ECs1237	3131.49	-0.307575	0.256283	-1.20014	0.230086	0.908511
ECs1238	72.1397	-0.254096	0.290694	-0.874103	0.382062	0.980199
ECs1239	64.1291	-0.11789	0.296305	-0.397868	0.690727	0.982645
ECs1240	58.1924	0.063328	0.298915	0.211859	0.832217	0.989243
ECs1241	178.361	0.0475291	0.263922	0.180088	0.857084	0.991575
ECs1242	2179.12	-0.181395	0.243434	-0.745151	0.45618	0.980199
ECs1243	460.584	-0.196619	0.245289	-0.801581	0.422796	0.980199
ECs1244	22644.1	-0.094369	0.247428	-0.3814	0.702906	0.983002
ECs1245	36471.3	-0.111755	0.257872	-0.433374	0.664743	0.980381
ECs1246	168.722	-0.136912	0.262531	-0.521507	0.602014	0.980199
ECs1247	137.381	0.0396994	0.275656	0.144018	0.885486	0.993106
ECs1248	43.507	-0.0469742	0.312665	-0.150238	0.880577	0.993106
ECs1249	30.9036	-0.403853	0.324601	-1.24415	0.213443	0.889508
ECs1250	12.2219	0.0394551	0.341046	0.115688	0.907899	NA
ECs1251	142.637	-0.15129	0.28875	-0.523947	0.600315	0.980199
ECs1252	73.8101	0.0510911	0.30611	0.166904	0.867445	0.993106
ECs1253	17.5075	-0.545419	0.340528	-1.60169	0.109225	NA
ECs1254	6.45403	-0.367624	0.325969	-1.12779	0.25941	NA
ECs1255	8.51218	-0.14683	0.334727	-0.438657	0.66091	NA
ECs1256	2.64298	0.0954838	0.259361	0.36815	0.712761	NA
ECs1257	2.65917	0.222614	0.261722	0.850573	0.395007	NA
ECs1258	3.9295	0.0645235	0.289081	0.223202	0.823378	NA
ECs1259	216.501	0.0823235	0.278404	0.295698	0.76746	0.983586
ECs1260	16160.7	-0.587803	0.237857	-2.47125	0.0134642	0.338825
ECs1261	1697.87	0.0494733	0.309714	0.159738	0.873087	0.993106
ECs1262	282.826	0.149457	0.271866	0.549746	0.582493	0.980199
ECs1263	59.1865	0.825067	0.341718	2.41447	0.0157582	0.372955
ECs1264	323.305	0.612272	0.293021	2.08952	0.0366609	0.54529
ECs1265	314.952	1.2327	0.334222	3.68827	0.000225785	0.0202764
ECs1266	1313.97	0.343398	0.2492	1.378	0.168203	0.853573
ECs1267	121.665	0.0691776	0.280845	0.246319	0.805435	0.985586
ECs1268	128.128	0.0701999	0.285751	0.245668	0.805939	0.985586
ECs1269	121.781	0.0465038	0.281734	0.165063	0.868894	0.993106
ECs1270	208.694	0.175501	0.302191	0.580762	0.561401	0.980199
ECs1271	92.5199	0.190441	0.286333	0.665103	0.505985	0.980199
ECs1272	591.121	-0.0685014	0.2648	-0.258691	0.795874	0.985586
ECs1273	72.5178	0.55114	0.321353	1.71506	0.0863341	0.740761
ECs1274	157.724	0.177135	0.288784	0.613384	0.539623	0.980199
ECs1275	16.943	0.096183	0.34191	0.281311	0.778472	NA
ECs1276	61.8519	-0.160473	0.300733	-0.533608	0.593613	0.980199
ECs1277	289.073	0.52288	0.27059	1.93237	0.0533135	0.622898
ECs1278	68.3788	-0.141396	0.295117	-0.479117	0.631856	0.980199
ECs1279	10.1378	-0.399286	0.319227	-1.25079	0.211011	NA
ECs1280	38.1879	-0.260378	0.316179	-0.823516	0.410215	0.980199
ECs1281	1.741	-0.256464	0.217918	-1.17688	0.239242	NA
ECs1282	239.783	0.115525	0.259907	0.444486	0.656691	0.980199
ECs1283	6.13086	-0.170426	0.321569	-0.529983	0.596124	NA
ECs1284	2.09956	-0.0211309	0.19975	-0.105787	0.915752	NA
ECs1285	4.57923	-0.163626	0.305286	-0.535976	0.591975	NA
ECs1286	2.67547	0.0484841	0.256712	0.188866	0.850198	NA
ECs1287	7.33603	0.0321232	0.331025	0.0970415	0.922693	NA
ECs1288	50.4501	0.232215	0.307204	0.755899	0.44971	0.980199
ECs1289	45.3765	-0.282031	0.314897	-0.895629	0.370451	0.980199
ECs1290	93.7721	-0.3041	0.297396	-1.02254	0.306524	0.971732
ECs1291	15.8354	0.101913	0.341404	0.298513	0.765312	NA
ECs1292	11.3408	0.060363	0.33479	0.180301	0.856916	NA
ECs1293	10.0122	0.2808	0.332916	0.843454	0.398974	NA
ECs1294	17.3749	-0.243712	0.34144	-0.713778	0.475364	NA
ECs1295	3.46846	0.232884	0.277777	0.838385	0.401814	NA
ECs1296	11.2733	-0.017294	0.34005	-0.0508574	0.959439	NA
ECs1297	1.8583	-0.0722594	0.19805	-0.364854	0.71522	NA
ECs1298	22.0349	0.36901	0.341079	1.08189	0.279302	0.955311
ECs1299	166.418	0.0050744	0.264374	0.019194	0.984686	0.999269
ECs1300	1101.43	-0.392309	0.28283	-1.38708	0.165416	0.847117
ECs1301	1.14933	0.135837	0.179114	0.758379	0.448224	NA
ECs1302	70.2318	0.107879	0.300329	0.359203	0.719443	0.983458
ECs1303	42.8988	0.22291	0.3205	0.695507	0.486737	0.980199
ECs1304	11.2175	0.0205164	0.340791	0.0602022	0.951995	NA
ECs1305	934.946	-0.159303	0.241547	-0.659511	0.509568	0.980199
ECs1307	92.5979	0.0706884	0.282783	0.249973	0.802608	0.985586
ECs1308	11.2689	-0.112496	0.339449	-0.331409	0.740336	NA
ECs1309	16.7883	-0.121633	0.341518	-0.356153	0.721726	NA
ECs1311	20.6314	0.0481401	0.336264	0.143162	0.886163	NA
ECs1312	11.2668	0.234523	0.338405	0.693023	0.488295	NA
ECs1315	1.99718	-0.0599091	0.23883	-0.250844	0.801935	NA
ECs1316	190.429	0.194934	0.271822	0.717139	0.473288	0.980199
ECs1317	139.986	0.0616217	0.274567	0.224433	0.822421	0.988497
ECs1319	67.7492	0.297119	0.315739	0.941026	0.346691	0.980199
ECs1320	16.534	-0.0616025	0.341451	-0.180414	0.856828	NA
ECs1321	72.2283	0.360787	0.31841	1.13309	0.257176	0.92965
ECs1322	44.8302	-0.021982	0.326403	-0.067346	0.946306	0.999269
ECs1323	165.32	-0.0550082	0.268382	-0.204962	0.837602	0.989762
ECs1324	918.336	-0.125718	0.241586	-0.520384	0.602796	0.980199
ECs1325	174.048	-0.211035	0.271985	-0.775906	0.437804	0.980199
ECs1326	157.141	-0.108694	0.270674	-0.401568	0.688002	0.982645
ECs1327	147.202	0.206058	0.266638	0.772799	0.439641	0.980199
ECs1328	49.8133	-0.0426681	0.314153	-0.13582	0.891964	0.993106
ECs1330	2125.42	-0.0335119	0.236642	-0.141614	0.887385	0.993106
ECs1334	0.421789	-0.0427976	0.112375	-0.380847	0.703317	NA
ECs1335	64.175	0.144015	0.301646	0.47743	0.633056	0.980199
ECs1336	35.5316	0.00210074	0.322117	0.00652167	0.994796	0.999269
ECs1337	17.0635	0.174247	0.340869	0.511185	0.609221	NA
ECs1338	18.0305	0.0372599	0.339052	0.109894	0.912493	NA
ECs1339	757.38	0.126854	0.254649	0.498154	0.618375	0.980199
ECs1340	161.691	-0.0941521	0.268749	-0.350334	0.726088	0.983458
ECs1343	558.006	1.59118	0.263955	6.02824	1.65759e-09	5.42269e-07
ECs1344	828.819	1.09962	0.259518	4.23716	2.26369e-05	0.0030367
ECs1345	169.18	-0.477081	0.270646	-1.76275	0.0779434	0.711915
ECs1346	135.774	-0.637775	0.272405	-2.34128	0.019218	0.400514
ECs1347	68.3422	-0.453839	0.306718	-1.47966	0.138964	0.831677
ECs1348	95.9582	-0.729119	0.287043	-2.5401	0.011082	0.313305
ECs1349	75.0092	-0.65896	0.294601	-2.23679	0.0252999	0.469124
ECs1350	37.9626	-0.0110552	0.320091	-0.0345378	0.972448	0.999269
ECs1351	1267.08	-0.873082	0.239614	-3.64371	0.000268737	0.0221731
ECs1352	1145.7	-0.809307	0.249607	-3.24232	0.00118559	0.0743838
ECs1353	741.072	-0.940652	0.242956	-3.87169	0.000108082	0.0110132
ECs1354	1768.82	-0.653329	0.234981	-2.78035	0.00543007	0.195783
ECs1355	3464.56	-0.528452	0.250505	-2.10955	0.0348975	0.536658
ECs1356	4081.02	-0.544223	0.248172	-2.19293	0.0283128	0.486248
ECs1357	8.9377	-0.574872	0.330303	-1.74044	0.081782	NA
ECs1359	13.9176	-0.0203004	0.341895	-0.0593763	0.952652	NA
ECs1360	248.759	0.713398	0.322679	2.21086	0.0270455	0.485758
ECs1362	3.35327	-0.0709096	0.275833	-0.257074	0.797122	NA
ECs1364	20.0935	-0.201688	0.340982	-0.591491	0.554191	NA
ECs1365	1.20478	-0.0490694	0.187944	-0.261085	0.794027	NA
ECs1366	1.07172	0.0346262	0.149257	0.23199	0.816546	NA
ECs1367	3.79433	-0.0335017	0.291467	-0.114942	0.908491	NA
ECs1370	194.602	0.168409	0.295082	0.570718	0.568191	0.980199
ECs1372	7.73199	0.528032	0.323633	1.63158	0.102769	NA
ECs1373	26.8723	0.521757	0.334516	1.55974	0.118822	0.807444
ECs1374	24.248	1.14416	0.341807	3.34739	0.000815761	0.0541476
ECs1375	2.46405	-0.177375	0.246767	-0.718797	0.472266	NA
ECs1376	15.3313	-0.0309667	0.341928	-0.090565	0.927838	NA
ECs1377	85.0436	-0.108095	0.300864	-0.359284	0.719383	0.983458
ECs1378	878.3	-0.24229	0.263335	-0.920085	0.357528	0.980199
ECs1379	261.087	-0.199244	0.271258	-0.734519	0.462632	0.980199
ECs1380	95.465	-0.0236244	0.288063	-0.0820111	0.934638	0.999269
ECs1381	31.4637	0.179552	0.33065	0.543026	0.587112	0.980199
ECs1382	677.976	-0.378791	0.305352	-1.2405	0.214789	0.89349
ECs1386	1035.05	-0.410512	0.309887	-1.32471	0.185266	0.856477
ECs1387	870.422	-0.569357	0.303549	-1.87567	0.0607011	0.658606
ECs1388	298.011	-0.511543	0.303112	-1.68764	0.0914809	0.750103
ECs1389	437.984	-0.669638	0.294471	-2.27403	0.022964	0.440064
ECs1392	140.116	-0.414938	0.330765	-1.25448	0.209668	0.887855
ECs1393	201.724	-0.398442	0.329204	-1.21032	0.226156	0.908138
ECs1394	494.892	-0.249833	0.305987	-0.816484	0.414223	0.980199
ECs1395	98.7321	-0.267591	0.334197	-0.8007	0.423305	0.980199
ECs1396	455.783	-0.67692	0.258396	-2.6197	0.00880075	0.263447
ECs1397	374.393	-0.2941	0.248913	-1.18154	0.237389	0.914863
ECs1398	126.885	-0.154891	0.27553	-0.562157	0.574009	0.980199
ECs1399	168.89	-0.0921446	0.271842	-0.338964	0.734637	0.983458
ECs1400	1.94467	-0.052047	0.219429	-0.237193	0.812507	NA
ECs1401	8.8991	0.0510711	0.323466	0.157887	0.874546	NA
ECs1402	5.61251	0.0266014	0.293986	0.0904855	0.927901	NA
ECs1403	4.90741	-0.224368	0.307727	-0.729114	0.465932	NA
ECs1404	4.73025	0.234788	0.306962	0.764877	0.444345	NA
ECs1405	4.45079	-0.171473	0.304907	-0.562378	0.573858	NA
ECs1406	2.46816	-0.0934215	0.261191	-0.357674	0.720587	NA
ECs1407	17.2424	0.0226579	0.340494	0.0665442	0.946945	NA
ECs1408	11.0149	0.304232	0.340806	0.892683	0.372027	NA
ECs1409	147.076	-0.0411201	0.291458	-0.141084	0.887803	0.993106
ECs1410	623.448	0.15746	0.254392	0.618967	0.535938	0.980199
ECs1411	908.593	0.140822	0.250585	0.561973	0.574134	0.980199
ECs1412	513.375	0.263029	0.254682	1.03277	0.30171	0.967669
ECs1413	204.401	-0.131104	0.268504	-0.488277	0.625354	0.980199
ECs1414	119.671	-0.0916319	0.283695	-0.322994	0.7467	0.983458
ECs1415	38.6567	0.299792	0.325743	0.920335	0.357398	0.980199
ECs1416	33.4707	0.18108	0.329469	0.549613	0.582585	0.980199
ECs1417	94.9516	0.0011504	0.29419	0.00391039	0.99688	0.999269
ECs1418	0	NA	NA	NA	NA	NA
ECs1419	36.2483	-0.434953	0.321999	-1.35079	0.176763	0.85464
ECs1420	84.651	-0.473511	0.301617	-1.56991	0.116436	0.807444
ECs1421	1.88452	0.0442494	0.207197	0.213562	0.830889	NA
ECs1422	12.2825	0.595605	0.341337	1.74492	0.0809991	NA
ECs1423	1312.44	-0.304594	0.280985	-1.08402	0.278355	0.952815
ECs1424	1376.35	-0.138887	0.260165	-0.533841	0.593452	0.980199
ECs1425	35.2837	0.471144	0.321986	1.46324	0.143401	0.833473
ECs1426	2580.59	0.136165	0.258139	0.527488	0.597855	0.980199
ECs1427	3647.96	-0.0065478	0.236135	-0.027729	0.977878	0.999269
ECs1428	41.8243	0.00452696	0.318679	0.0142054	0.988666	0.999269
ECs1429	19804.5	-0.190369	0.252064	-0.755242	0.450104	0.980199
ECs1432	404.379	-0.16927	0.254048	-0.666291	0.505225	0.980199
ECs1433	112.394	0.45407	0.283098	1.60393	0.108729	0.793241
ECs1434	895.687	0.227325	0.275645	0.824704	0.40954	0.980199
ECs1435	161.699	0.0916082	0.289191	0.316773	0.751416	0.983458
ECs1436	2.12136	0.26697	0.236248	1.13004	0.258459	NA
ECs1437	457.598	0.407904	0.27621	1.47679	0.139732	0.831677
ECs1438	5990.33	-0.287375	0.319869	-0.898416	0.368964	0.980199
ECs1439	117.833	0.307797	0.281227	1.09448	0.273745	0.946943
ECs1440	395.305	0.441822	0.318465	1.38735	0.165335	0.847117
ECs1441	1571.14	-0.091259	0.253181	-0.36045	0.718511	0.983458
ECs1442	15676.5	-0.454151	0.281818	-1.61151	0.107069	0.790956
ECs1443	79.9594	-0.25457	0.290684	-0.875762	0.381159	0.980199
ECs1444	870.546	-0.270399	0.249125	-1.08539	0.277747	0.952815
ECs1445	1094.75	-0.259989	0.25475	-1.02056	0.307461	0.971732
ECs1446	1010.4	-0.209912	0.256238	-0.819209	0.412667	0.980199
ECs1447	156.746	-0.000545315	0.271277	-0.00201018	0.998396	0.999269
ECs1448	57.7495	-0.227578	0.299635	-0.759519	0.447542	0.980199
ECs1449	60.7719	0.000458392	0.297901	0.00153874	0.998772	0.999282
ECs1450	40.1491	0.174232	0.323894	0.53793	0.590625	0.980199
ECs1451	2.9693	0.0535307	0.270803	0.197674	0.8433	NA
ECs1452	3.81376	0.323764	0.280672	1.15353	0.248693	NA
ECs1453	12.1604	0.227441	0.338442	0.672021	0.50157	NA
ECs1454	39.2844	-0.127128	0.322025	-0.394778	0.693007	0.982645
ECs1455	12.2389	-0.0706778	0.340379	-0.207644	0.835507	NA
ECs1456	26.4704	-0.200866	0.332064	-0.6049	0.545245	0.980199
ECs1457	14.0554	-0.0637333	0.341813	-0.186457	0.852086	NA
ECs1458	26.5082	0.163498	0.329954	0.495517	0.620235	0.980199
ECs1459	19.6965	0.141711	0.338159	0.419067	0.675167	NA
ECs1460	138.312	0.0238082	0.268732	0.0885944	0.929404	0.999269
ECs1461	186.357	0.0582934	0.262552	0.222026	0.824293	0.988957
ECs1462	4978.09	-0.00927426	0.257709	-0.0359873	0.971292	0.999269
ECs1463	5.54648	0.162103	0.297998	0.543973	0.58646	NA
ECs1464	171.766	0.359313	0.270002	1.33078	0.183262	0.856477
ECs1465	1303.95	0.121036	0.241601	0.500977	0.616387	0.980199
ECs1466	8169.78	-0.0397111	0.260836	-0.152245	0.878993	0.993106
ECs1467	7159.4	-0.0953889	0.24593	-0.38787	0.698112	0.982645
ECs1468	2200.9	-0.0165035	0.24014	-0.0687247	0.945209	0.999269
ECs1469	2195.23	0.0389061	0.246351	0.15793	0.874512	0.993106
ECs1470	4888.63	-0.0875823	0.246213	-0.355717	0.722052	0.983458
ECs1471	10939.6	0.0289339	0.238988	0.121068	0.903637	0.993106
ECs1472	12166.2	0.0921736	0.236038	0.390503	0.696164	0.982645
ECs1473	6139.11	0.640376	0.294848	2.17189	0.0298642	0.501019
ECs1474	283.422	0.0167876	0.252033	0.0666086	0.946893	0.999269
ECs1475	264.362	0.0663223	0.26553	0.249773	0.802763	0.985586
ECs1476	406.612	-0.0168687	0.25064	-0.0673025	0.946341	0.999269
ECs1477	521.556	0.052844	0.243048	0.217422	0.827879	0.9891
ECs1478	2848.73	-0.170601	0.28231	-0.604303	0.545642	0.980199
ECs1479	3470.73	0.387572	0.23972	1.61677	0.105928	0.790956
ECs1480	66.4771	-0.147019	0.302282	-0.486365	0.626708	0.980199
ECs1481	2247.73	0.00119916	0.243964	0.00491532	0.996078	0.999269
ECs1482	2153.98	0.0515996	0.239515	0.215433	0.829429	0.9891
ECs1483	4413.36	-0.123596	0.243062	-0.508494	0.611107	0.980199
ECs1484	679.279	-0.0952189	0.244495	-0.389452	0.696942	0.982645
ECs1485	2237.51	-0.164697	0.23431	-0.702903	0.482116	0.980199
ECs1486	2859.27	-0.233505	0.240342	-0.971552	0.331273	0.980199
ECs1487	493.664	-0.192524	0.244709	-0.786746	0.431431	0.980199
ECs1488	77.6863	-0.392569	0.292116	-1.34388	0.178987	0.856477
ECs1489	594.333	-0.371032	0.266331	-1.39312	0.163583	0.844208
ECs1490	100.036	-0.454278	0.299959	-1.51447	0.129908	0.826099
ECs1491	596.942	0.516757	0.278932	1.85263	0.0639353	0.668548
ECs1492	3063.46	0.316878	0.233454	1.35735	0.174671	0.854378
ECs1493	14.351	-0.3416	0.341922	-0.999059	0.317766	NA
ECs1494	207.924	0.375103	0.295783	1.26817	0.204737	0.881292
ECs1495	402.201	0.186789	0.282591	0.660986	0.508621	0.980199
ECs1496	1373.71	-0.139349	0.243592	-0.572062	0.56728	0.980199
ECs1497	1303.8	-0.105694	0.242976	-0.434998	0.663564	0.980199
ECs1498	1220.28	-0.185014	0.239082	-0.77385	0.43902	0.980199
ECs1499	7447.75	-0.333459	0.234983	-1.41908	0.155876	0.844208
ECs1500	1446.12	-0.152894	0.242681	-0.63002	0.528682	0.980199
ECs1501	260.911	0.0104831	0.272993	0.0384008	0.969368	0.999269
ECs1502	23.6649	-0.186817	0.335275	-0.557204	0.577388	0.980199
ECs1503	62.8093	-0.454248	0.305273	-1.48801	0.136749	0.831677
ECs1504	199.832	-0.0564586	0.289463	-0.195046	0.845357	0.990306
ECs1505	132.129	-0.529658	0.281002	-1.88489	0.0594442	0.648092
ECs1506	575.618	-0.461682	0.269447	-1.71344	0.0866311	0.740761
ECs1507	45.4799	-0.27719	0.311604	-0.889558	0.373703	0.980199
ECs1508	71.8313	-0.0846332	0.304693	-0.277765	0.781192	0.985081
ECs1509	130.957	-0.427733	0.2793	-1.53145	0.125658	0.810584
ECs1510	80.0535	-0.510347	0.298312	-1.71078	0.0871209	0.740761
ECs1511	117.701	-0.438381	0.28544	-1.53581	0.124586	0.807444
ECs1512	40.4129	-0.144488	0.332525	-0.434519	0.663912	0.980199
ECs1513	40.068	-0.297627	0.314921	-0.945084	0.344616	0.980199
ECs1514	80.6418	-0.403143	0.288256	-1.39856	0.161946	0.844208
ECs1515	87.7074	-0.10203	0.289717	-0.35217	0.724711	0.983458
ECs1516	132.918	-0.156437	0.272749	-0.573557	0.566268	0.980199
ECs1517	80.2742	-0.14376	0.2878	-0.499515	0.617417	0.980199
ECs1518	173.973	-0.0501024	0.273408	-0.183251	0.854601	0.991575
ECs1520	9229.18	-0.0349096	0.24182	-0.144362	0.885215	0.993106
ECs1521	15.8336	-0.0824795	0.340781	-0.242031	0.808756	NA
ECs1522	16.8277	-0.250976	0.341885	-0.734096	0.46289	NA
ECs1523	14.3838	0.0467033	0.341683	0.136686	0.891279	NA
ECs1524	111.349	0.0268992	0.28203	0.0953769	0.924015	0.998111
ECs1525	966.303	-0.355075	0.276439	-1.28446	0.198981	0.872107
ECs1526	3.04056	0.20302	0.267205	0.759792	0.447379	NA
ECs1527	176.629	-0.375388	0.264498	-1.41925	0.155828	0.844208
ECs1528	6.04084	-0.168757	0.317998	-0.530686	0.595636	NA
ECs1529	4.39618	-0.446895	0.293485	-1.52272	0.12783	NA
ECs1530	8.21821	-0.134645	0.331641	-0.405998	0.684744	NA
ECs1531	34.392	-0.240397	0.32525	-0.739115	0.459837	0.980199
ECs1532	17.0328	-0.191943	0.340398	-0.563879	0.572836	NA
ECs1533	28.0867	0.157106	0.329855	0.476289	0.633869	0.980199
ECs1534	42.0515	0.316476	0.316438	1.00012	0.317253	0.976206
ECs1536	22.7381	0.00676779	0.341142	0.0198386	0.984172	0.999269
ECs1537	58.3622	-0.0900862	0.307407	-0.293052	0.769482	0.984713
ECs1538	38.877	-0.150247	0.328163	-0.457843	0.647065	0.980199
ECs1539	20.072	-0.684169	0.338005	-2.02414	0.0429558	NA
ECs1540	46.1942	-0.0355613	0.310728	-0.114445	0.908885	0.993467
ECs1541	51.9044	-0.0574073	0.305416	-0.187964	0.850904	0.991575
ECs1542	132.463	0.118153	0.289434	0.408222	0.68311	0.982645
ECs1543	212.433	-0.301237	0.263749	-1.14214	0.253398	0.92689
ECs1544	279.882	-0.270108	0.251779	-1.0728	0.283361	0.957941
ECs1545	60.8279	-0.398676	0.30021	-1.32799	0.184181	0.856477
ECs1546	61.4351	-0.213929	0.301193	-0.710273	0.477535	0.980199
ECs1547	104.648	-0.329645	0.294294	-1.12012	0.262662	0.939097
ECs1548	63.077	-0.284961	0.315964	-0.901878	0.367122	0.980199
ECs1549	82.4644	-0.250108	0.288829	-0.865937	0.386525	0.980199
ECs1550	40.0792	-0.125347	0.317448	-0.39486	0.692946	0.982645
ECs1551	23.7502	-0.1811	0.333555	-0.54294	0.587171	0.980199
ECs1554	29.4503	-0.170046	0.335577	-0.506727	0.612346	0.980199
ECs1555	55.2324	-0.144192	0.306678	-0.470175	0.63823	0.980199
ECs1556	441.469	-0.360761	0.269819	-1.33705	0.181207	0.856477
ECs1557	81.8216	0.116391	0.304178	0.382642	0.701985	0.983002
ECs1558	29.0662	-0.118509	0.338938	-0.349648	0.726603	0.983458
ECs1559	16.7583	0.308744	0.341294	0.904628	0.365663	NA
ECs1560	248.694	0.12097	0.26675	0.453495	0.650192	0.980199
ECs1561	135.848	0.129029	0.294152	0.438649	0.660916	0.980199
ECs1564	101.293	-0.15709	0.289378	-0.542854	0.58723	0.980199
ECs1565	56.7978	-0.266568	0.304831	-0.874477	0.381858	0.980199
ECs1567	167.982	-0.115755	0.298201	-0.388177	0.697885	0.982645
ECs1568	212.61	0.466422	0.301003	1.54956	0.121248	0.807444
ECs1569	6.79001	-0.0901414	0.325581	-0.276863	0.781885	NA
ECs1570	198.709	0.103003	0.315545	0.326429	0.7441	0.983458
ECs1571	305.021	0.112286	0.295057	0.380556	0.703533	0.983002
ECs1572	4060.14	-0.309476	0.282756	-1.0945	0.273738	0.946943
ECs1573	1571	0.12554	0.238835	0.525637	0.59914	0.980199
ECs1574	278.458	-0.0776485	0.256291	-0.30297	0.761912	0.983458
ECs1576	25.4694	0.678291	0.333572	2.03341	0.0420107	0.574355
ECs1577	13.5144	0.18857	0.341926	0.551494	0.581295	NA
ECs1578	10.6902	0.259409	0.33594	0.772188	0.440003	NA
ECs1579	8.71719	0.367421	0.331124	1.10962	0.267164	NA
ECs1580	8.82982	0.37711	0.332782	1.13321	0.257128	NA
ECs1581	7.58206	0.538335	0.330228	1.63019	0.103061	NA
ECs1585	12.6937	0.287595	0.341229	0.842822	0.399328	NA
ECs1586	44.3598	0.00895145	0.311358	0.0287497	0.977064	0.999269
ECs1587	68.238	-0.217889	0.300277	-0.725628	0.468067	0.980199
ECs1588	41.241	0.12783	0.32166	0.397407	0.691067	0.982645
ECs1589	338.705	-0.199641	0.267185	-0.747201	0.454942	0.980199
ECs1590	61.6106	0.598036	0.299274	1.99829	0.0456851	0.589402
ECs1591	14.8417	-0.183326	0.341767	-0.536408	0.591677	NA
ECs1592	39.8082	0.254074	0.3191	0.796222	0.425903	0.980199
ECs1593	22.5803	0.0035166	0.338076	0.0104018	0.991701	0.999269
ECs1594	16.3423	-0.18701	0.341923	-0.546934	0.584424	NA
ECs1595	33.4299	0.0941024	0.327278	0.28753	0.773706	0.985081
ECs1596	14.3135	0.12079	0.341927	0.353263	0.723891	NA
ECs1597	22.0706	0.014585	0.335778	0.0434365	0.965354	0.999269
ECs1598	110.929	0.0818458	0.277866	0.294551	0.768337	0.984056
ECs1599	31.3601	-0.225915	0.324792	-0.695569	0.486699	0.980199
ECs1601	2963.55	1.32211	0.24199	5.46347	4.66913e-08	1.06923e-05
ECs1602	4148.57	1.04316	0.232788	4.48116	7.42379e-06	0.00117245
ECs1603	2132.59	0.051204	0.284197	0.180171	0.857018	0.991575
ECs1604	665.631	0.211439	0.266997	0.791917	0.428409	0.980199
ECs1605	684.905	0.209706	0.267732	0.783268	0.43347	0.980199
ECs1606	276.245	0.250309	0.280358	0.892821	0.371953	0.980199
ECs1607	208.961	-0.0468814	0.287432	-0.163104	0.870436	0.993106
ECs1608	29399.2	-0.175	0.256695	-0.681742	0.495402	0.980199
ECs1609	3.97246	-0.311581	0.282454	-1.10312	0.269974	NA
ECs1610	0.26516	0.040484	0.111846	0.361963	0.717379	NA
ECs1611	91.1567	-0.398851	0.285947	-1.39484	0.163064	0.844208
ECs1612	83.9941	-0.183667	0.29234	-0.628265	0.52983	0.980199
ECs1613	14.2379	0.0152151	0.341906	0.0445008	0.964505	NA
ECs1614	24.9712	-0.0610272	0.332884	-0.183329	0.85454	0.991575
ECs1615	9.5995	-0.441495	0.335664	-1.31529	0.188413	NA
ECs1616	4.54695	0.144646	0.308098	0.46948	0.638726	NA
ECs1617	3.9023	0.340017	0.286734	1.18583	0.23569	NA
ECs1618	4.95496	0.0449097	0.306328	0.146607	0.883442	NA
ECs1619	6.42221	-0.106074	0.318213	-0.333343	0.738875	NA
ECs1620	16.3628	-0.461049	0.341903	-1.34848	0.177505	NA
ECs1621	3.57101	0.30424	0.267758	1.13625	0.255852	NA
ECs1622	8.41496	-0.211731	0.331399	-0.638899	0.522889	NA
ECs1623	11.5753	0.00486634	0.341234	0.014261	0.988622	NA
ECs1624	6.54449	0.114808	0.321397	0.357217	0.72093	NA
ECs1625	424.35	0.541885	0.283828	1.9092	0.0562361	0.641141
ECs1626	8.58449	-0.208604	0.323504	-0.644825	0.51904	NA
ECs1627	40.1857	-0.817747	0.334922	-2.4416	0.0146222	0.354336
ECs1628	17.3404	-0.0609555	0.341923	-0.178272	0.858509	NA
ECs1629	14.4361	0.0345922	0.341851	0.101191	0.919399	NA
ECs1630	41.4426	0.151736	0.319179	0.475395	0.634506	0.980199
ECs1631	15.6908	0.159481	0.341452	0.467067	0.640452	NA
ECs1632	84.1625	-0.0144042	0.288195	-0.0499808	0.960138	0.999269
ECs1633	51.3293	-0.498524	0.308168	-1.6177	0.105727	0.790956
ECs1634	35.7042	-0.376235	0.320458	-1.17405	0.240374	0.916847
ECs1635	31.5127	0.183567	0.327931	0.559772	0.575635	0.980199
ECs1636	11.6442	-0.0267369	0.340716	-0.0784726	0.937452	NA
ECs1637	8.44688	0.113654	0.3343	0.339975	0.733875	NA
ECs1638	9.87584	0.151266	0.339149	0.446016	0.655586	NA
ECs1639	9.03435	0.173115	0.334219	0.517969	0.60448	NA
ECs1640	36.7256	0.297936	0.328119	0.908011	0.363872	0.980199
ECs1641	23.9514	-0.262412	0.336265	-0.780373	0.435171	0.980199
ECs1642	13.2455	-0.0910263	0.341919	-0.266222	0.790068	NA
ECs1643	85.3906	-0.0856535	0.288198	-0.297204	0.766311	0.983458
ECs1644	11.6852	-0.108511	0.340452	-0.318726	0.749934	NA
ECs1645	17.9087	-0.317935	0.340123	-0.934765	0.349909	NA
ECs1646	9.27541	0.270676	0.333066	0.812678	0.416403	NA
ECs1647	10.0317	0.653783	0.335177	1.95056	0.0511094	NA
ECs1648	136.142	0.139284	0.278214	0.500637	0.616626	0.980199
ECs1649	43.6178	-0.356862	0.320516	-1.1134	0.265539	0.941018
ECs1650	40.4918	0.0196676	0.318944	0.0616648	0.95083	0.999269
ECs1651	16.4163	0.197359	0.341595	0.577756	0.563429	NA
ECs1652	3113.97	-0.512586	0.245501	-2.08792	0.0368053	0.54529
ECs1653	1764.21	-0.545795	0.248438	-2.1969	0.0280273	0.48623
ECs1654	1806.13	-0.517865	0.239533	-2.16198	0.0306198	0.506331
ECs1655	13257.2	-0.575316	0.320075	-1.79744	0.0722656	0.703533
ECs1656	182.463	0.317834	0.284087	1.11879	0.26323	0.939097
ECs1657	5.9275	-0.0602453	0.316026	-0.190634	0.848812	NA
ECs1658	16.3003	-0.231745	0.340566	-0.680469	0.496207	NA
ECs1659	10.9095	-0.170437	0.340429	-0.500655	0.616614	NA
ECs1660	91.5663	0.165926	0.282048	0.588292	0.556336	0.980199
ECs1662	710.485	0.339263	0.320693	1.05791	0.290098	0.958175
ECs1663	7389.72	0.0680311	0.265308	0.256423	0.797624	0.985586
ECs1664	404.469	0.00497654	0.250643	0.0198551	0.984159	0.999269
ECs1665	145.57	-0.0934797	0.269616	-0.346714	0.728806	0.983458
ECs1666	402.697	-0.0443292	0.25182	-0.176035	0.860266	0.992007
ECs1667	372.972	-0.373466	0.262191	-1.4244	0.15433	0.844208
ECs1668	1765.28	-0.0644769	0.272586	-0.236538	0.813015	0.986053
ECs1669	4614.8	0.024892	0.270643	0.0919734	0.926719	0.9991
ECs1670	1856.02	0.0135048	0.243158	0.0555391	0.955709	0.999269
ECs1671	383.853	0.172579	0.270831	0.637219	0.523982	0.980199
ECs1672	37.0249	-0.250581	0.324013	-0.773368	0.439305	0.980199
ECs1673	32.1305	-0.0262828	0.328913	-0.079908	0.93631	0.999269
ECs1674	393.246	0.122487	0.264129	0.463739	0.642835	0.980199
ECs1675	1401.93	0.0153004	0.239331	0.06393	0.949026	0.999269
ECs1676	540.013	-0.203387	0.254085	-0.800468	0.42344	0.980199
ECs1677	475.159	-0.475373	0.322441	-1.4743	0.140402	0.831677
ECs1678	28.7957	-0.404015	0.331801	-1.21764	0.223361	0.901443
ECs1679	70.6243	-0.29769	0.299685	-0.993343	0.320543	0.980199
ECs1680	149.869	0.248002	0.280109	0.885378	0.375953	0.980199
ECs1681	367.607	0.255383	0.304442	0.838857	0.40155	0.980199
ECs1682	358.625	-0.0840781	0.257513	-0.3265	0.744046	0.983458
ECs1683	12698.9	-0.339053	0.295436	-1.14764	0.251118	0.924456
ECs1684	3848.24	0.6292	0.310059	2.02929	0.0424287	0.574479
ECs1686	610.367	-0.0364952	0.245987	-0.148362	0.882057	0.993106
ECs1687	287.698	-0.0119411	0.261918	-0.0455911	0.963636	0.999269
ECs1688	256.533	0.161673	0.257041	0.628977	0.529364	0.980199
ECs1689	229.023	-0.0108063	0.266394	-0.0405653	0.967642	0.999269
ECs1690	66.1871	0.00790177	0.298234	0.0264952	0.978862	0.999269
ECs1691	18.7975	0.0380323	0.340445	0.111714	0.911051	NA
ECs1692	947.352	-0.269639	0.29944	-0.900478	0.367866	0.980199
ECs1693	55.6527	-0.0671128	0.309587	-0.216782	0.828379	0.9891
ECs1694	7.20988	-0.304514	0.326277	-0.933298	0.350666	NA
ECs1697	6.66315	-0.123812	0.327198	-0.378401	0.705133	NA
ECs1698	10.1785	-0.193628	0.336086	-0.576126	0.56453	NA
ECs1699	8.40861	-0.0961788	0.334286	-0.287714	0.773566	NA
ECs1700	0.906606	0.017979	0.163291	0.110104	0.912327	NA
ECs1703	839.412	-0.23024	0.253948	-0.90664	0.364597	0.980199
ECs1704	622.053	-0.287109	0.256165	-1.1208	0.262375	0.939097
ECs1705	1268.28	-0.312001	0.249338	-1.25132	0.210818	0.887855
ECs1706	1433.52	-0.155188	0.254964	-0.608666	0.542746	0.980199
ECs1707	73.391	-0.595825	0.318166	-1.87269	0.0611115	0.66012
ECs1708	1684.8	-0.117974	0.239289	-0.493017	0.622	0.980199
ECs1709	167.552	0.07563	0.270108	0.279999	0.779478	0.985081
ECs1710	31341.6	-0.428425	0.319749	-1.33988	0.180285	0.856477
ECs1711	144.377	0.220076	0.306654	0.717669	0.472962	0.980199
ECs1712	5018.27	-0.0277787	0.303637	-0.0914864	0.927106	0.9991
ECs1713	2526.92	-0.0843344	0.258659	-0.326044	0.744391	0.983458
ECs1714	570.357	0.290926	0.284606	1.0222	0.306684	0.971732
ECs1715	540.021	0.194481	0.257191	0.756174	0.449545	0.980199
ECs1716	521.21	0.24889	0.269328	0.924116	0.355426	0.980199
ECs1717	217.048	0.270816	0.258135	1.04912	0.294122	0.959021
ECs1718	118.431	0.123231	0.275212	0.447768	0.65432	0.980199
ECs1719	475.01	0.0208865	0.258359	0.0808428	0.935567	0.999269
ECs1720	2012.68	-0.154518	0.255866	-0.603903	0.545908	0.980199
ECs1721	429.483	0.482607	0.283448	1.70263	0.0886366	0.742103
ECs1722	1220.42	0.0796066	0.258891	0.30749	0.75847	0.983458
ECs1723	2212.78	0.0547187	0.243954	0.224299	0.822525	0.988497
ECs1724	802.167	-0.217216	0.241347	-0.900015	0.368112	0.980199
ECs1725	47.7379	-0.0762112	0.308031	-0.247414	0.804588	0.985586
ECs1726	2317.76	0.431562	0.293591	1.46994	0.141578	0.831677
ECs1727	1790.65	0.626065	0.297147	2.10692	0.0351246	0.536658
ECs1728	3177.33	0.308153	0.299736	1.02808	0.303911	0.970652
ECs1729	10659.7	0.152555	0.304987	0.500202	0.616933	0.980199
ECs1730	4452.15	0.111695	0.291947	0.382587	0.702026	0.983002
ECs1731	2196.91	0.131585	0.28705	0.458403	0.646663	0.980199
ECs1732	2258.93	0.126584	0.28969	0.436963	0.662138	0.980199
ECs1733	4.48678	0.142479	0.306194	0.465323	0.6417	NA
ECs1734	472.947	0.0581698	0.246171	0.236298	0.813201	0.986053
ECs1735	202.113	-0.223525	0.262985	-0.849953	0.395351	0.980199
ECs1736	910.162	0.0186999	0.238337	0.0784596	0.937462	0.999269
ECs1737	1965.87	-0.19588	0.239507	-0.817846	0.413445	0.980199
ECs1738	3332.66	0.0488988	0.239036	0.204567	0.83791	0.989762
ECs1739	26841	-0.171135	0.232718	-0.735375	0.462111	0.980199
ECs1740	146.797	0.435856	0.305769	1.42544	0.15403	0.844208
ECs1741	13422.5	-0.451854	0.249808	-1.80881	0.0704812	0.700226
ECs1742	182.77	-0.202288	0.2627	-0.770034	0.44128	0.980199
ECs1743	14026.2	-0.16019	0.240996	-0.664702	0.506241	0.980199
ECs1744	731.07	0.158472	0.273525	0.579367	0.562342	0.980199
ECs1745	1351.23	0.0175489	0.262841	0.0667664	0.946768	0.999269
ECs1746	2083.15	-0.280041	0.245852	-1.13906	0.254677	0.927655
ECs1747	2300.53	-0.18134	0.244812	-0.740734	0.458855	0.980199
ECs1748	362.579	0.0526864	0.253687	0.207683	0.835477	0.989762
ECs1749	855.913	0.174219	0.248133	0.702121	0.482604	0.980199
ECs1750	951.671	0.398183	0.238605	1.66879	0.0951584	0.751423
ECs1751	832.626	0.128968	0.264688	0.487246	0.626084	0.980199
ECs1752	164.799	0.85524	0.327808	2.60897	0.00908155	0.270088
ECs1753	49.0629	0.260184	0.315264	0.825288	0.409208	0.980199
ECs1754	238.163	0.0952006	0.25853	0.368238	0.712696	0.983458
ECs1755	364.201	0.110795	0.254753	0.434912	0.663627	0.980199
ECs1756	18393.7	-1.46036	0.320408	-4.55782	5.16862e-06	0.000876751
ECs1757	143.034	0.147402	0.28363	0.519697	0.603275	0.980199
ECs1758	12.3038	-0.0102671	0.340837	-0.0301233	0.975969	NA
ECs1759	166.676	-0.168815	0.272543	-0.619407	0.535648	0.980199
ECs1760	4.47784	-0.0269023	0.301977	-0.0890873	0.929013	NA
ECs1761	4.33595	-0.259871	0.304768	-0.852683	0.393835	NA
ECs1762	146.616	-0.358901	0.277954	-1.29122	0.196626	0.870936
ECs1763	21.7993	-0.1083	0.337851	-0.320554	0.748548	0.983458
ECs1764	29.8214	-0.285639	0.326016	-0.876149	0.380949	0.980199
ECs1765	502.243	-0.513265	0.26446	-1.9408	0.0522824	0.617147
ECs1766	8.66397	-0.514673	0.335481	-1.53414	0.124996	NA
ECs1767	27.9654	-0.350582	0.329086	-1.06532	0.28673	0.958175
ECs1768	107.791	-0.0716191	0.275958	-0.259529	0.795227	0.985586
ECs1769	93.115	-0.0201474	0.29981	-0.0672005	0.946422	0.999269
ECs1772	332.914	0.212026	0.267122	0.793742	0.427345	0.980199
ECs1773	9891.96	-0.0921644	0.259815	-0.354732	0.722791	0.983458
ECs1774	7.58032	-0.0944141	0.330282	-0.285859	0.774986	NA
ECs1775	20.7332	-0.0576997	0.34105	-0.169182	0.865653	0.993106
ECs1776	14.9692	-0.108761	0.341648	-0.318341	0.750227	NA
ECs1777	9.4519	0.243107	0.33831	0.718592	0.472392	NA
ECs1778	15.3863	-0.453929	0.341876	-1.32776	0.184257	NA
ECs1779	37.3692	0.0910247	0.332793	0.273518	0.784455	0.985586
ECs1780	104.899	0.136473	0.28972	0.471051	0.637605	0.980199
ECs1781	453.967	-0.203666	0.250529	-0.812945	0.41625	0.980199
ECs1782	13.3867	0.0984502	0.341923	0.287931	0.7734	NA
ECs1783	37.9606	-0.0373308	0.321426	-0.116141	0.907541	0.993106
ECs1784	14.7695	0.0052362	0.34174	0.0153222	0.987775	NA
ECs1785	26.0032	-0.331832	0.331876	-0.99987	0.317374	0.976206
ECs1786	86.3693	-0.145952	0.283779	-0.514317	0.60703	0.980199
ECs1788	16.2458	-0.674508	0.341644	-1.9743	0.0483474	NA
ECs1789	38.9771	0.522559	0.326778	1.59912	0.109793	0.794059
ECs1791	56.694	0.220202	0.300736	0.732211	0.46404	0.980199
ECs1792	126.858	-0.00292035	0.274008	-0.0106579	0.991496	0.999269
ECs1793	211.274	-0.321764	0.267754	-1.20171	0.229475	0.908511
ECs1795	342.241	-0.330138	0.248924	-1.32626	0.184753	0.856477
ECs1796	71.5362	-0.160101	0.291991	-0.548308	0.583481	0.980199
ECs1797	69.1517	-0.249473	0.316987	-0.787014	0.431274	0.980199
ECs1798	107.813	-0.227028	0.298593	-0.760325	0.44706	0.980199
ECs1799	56.7385	-0.519647	0.308137	-1.68642	0.0917157	0.750103
ECs1800	92.8705	-0.385093	0.285177	-1.35036	0.176899	0.85464
ECs1801	49.9758	-0.301097	0.308506	-0.975986	0.329072	0.980199
ECs1802	20.7412	-0.130925	0.336013	-0.389644	0.6968	0.982645
ECs1803	186.441	-0.143127	0.26269	-0.544852	0.585855	0.980199
ECs1804	19.6399	-0.180696	0.338447	-0.533898	0.593412	NA
ECs1805	26.4755	-0.355365	0.337218	-1.05381	0.291968	0.958366
ECs1806	224.588	-0.0869933	0.269331	-0.322997	0.746697	0.983458
ECs1807	45.871	0.0909262	0.313444	0.290087	0.771749	0.985081
ECs1808	36.4715	-0.192214	0.324076	-0.593114	0.553105	0.980199
ECs1809	31.8022	-0.0627881	0.324013	-0.193783	0.846346	0.990306
ECs1812	224.49	-0.0620573	0.274019	-0.226471	0.820835	0.988497
ECs1813	5.26851	0.271455	0.304859	0.890429	0.373236	NA
ECs1814	613.625	-0.0340469	0.259739	-0.131082	0.895711	0.993106
ECs1815	357.326	-0.10788	0.271425	-0.39746	0.691028	0.982645
ECs1818	99.145	0.131463	0.28194	0.466281	0.641014	0.980199
ECs1819	12.8341	0.059199	0.341856	0.17317	0.862518	NA
ECs1820	13.6707	0.0127031	0.341832	0.0371617	0.970356	NA
ECs1821	70.6619	0.478779	0.297898	1.60719	0.108012	0.793241
ECs1824	1537.46	-0.0176805	0.243464	-0.0726205	0.942108	0.999269
ECs1825	8822.68	-0.411947	0.263374	-1.56411	0.117791	0.807444
ECs1829	9639.95	-0.524658	0.290864	-1.80379	0.0712639	0.703424
ECs1830	13249.2	-0.429291	0.271875	-1.579	0.114336	0.807444
ECs1831	3770.87	-0.467193	0.286088	-1.63304	0.102461	0.785857
ECs1832	464.521	-0.444893	0.248024	-1.79375	0.072853	0.703533
ECs1833	522.335	-0.188093	0.258176	-0.728544	0.466281	0.980199
ECs1834	320.675	0.215464	0.249796	0.86256	0.38838	0.980199
ECs1835	127.59	-0.072276	0.271888	-0.26583	0.79037	0.985586
ECs1836	24.4293	0.00172445	0.333739	0.00516706	0.995877	0.999269
ECs1838	785.039	0.0964573	0.242198	0.398258	0.69044	0.982645
ECs1839	1227.28	0.127708	0.245468	0.520262	0.602881	0.980199
ECs1840	323.67	-0.0790707	0.253988	-0.311317	0.75556	0.983458
ECs1841	688.498	-0.192285	0.240374	-0.799941	0.423745	0.980199
ECs1842	231.137	0.200154	0.264574	0.756515	0.449341	0.980199
ECs1843	468.109	0.120589	0.246009	0.490181	0.624006	0.980199
ECs1844	958.716	-0.0162443	0.248155	-0.0654603	0.947808	0.999269
ECs1845	1502.46	-0.204188	0.250431	-0.815346	0.414874	0.980199
ECs1846	7520.18	0.51162	0.252529	2.02598	0.0427663	0.574945
ECs1847	617.345	0.0720348	0.245823	0.293036	0.769495	0.984713
ECs1849	18913	-0.143524	0.253489	-0.566193	0.571262	0.980199
ECs1850	611.032	-0.125322	0.253656	-0.494064	0.621261	0.980199
ECs1851	635.168	-0.115461	0.257428	-0.448517	0.65378	0.980199
ECs1852	673.063	0.0191027	0.249734	0.0764923	0.939027	0.999269
ECs1853	955.154	0.283502	0.248869	1.13916	0.254635	0.927655
ECs1854	181.704	0.219927	0.285335	0.770765	0.440846	0.980199
ECs1855	103.792	0.0536439	0.301083	0.17817	0.85859	0.99175
ECs1856	5229.75	-0.303709	0.28367	-1.07064	0.28433	0.958175
ECs1857	91.2537	0.0934729	0.282683	0.330663	0.740899	0.983458
ECs1858	4937.93	0.315941	0.239238	1.32061	0.18663	0.856477
ECs1859	1190.84	0.49564	0.314372	1.5766	0.114887	0.807444
ECs1860	75.4264	-0.123395	0.326512	-0.377917	0.705492	0.983309
ECs1861	3597.45	0.322262	0.264679	1.21756	0.223393	0.901443
ECs1862	38.7755	0.0315674	0.318188	0.0992097	0.920972	0.997707
ECs1863	14.488	0.157785	0.34191	0.461482	0.644453	NA
ECs1864	64.2008	-0.102485	0.296975	-0.345097	0.730022	0.983458
ECs1865	62.8025	-0.271468	0.306407	-0.885974	0.375632	0.980199
ECs1866	162.648	0.120376	0.279836	0.430167	0.667075	0.98052
ECs1867	647.512	-0.0901085	0.270911	-0.332613	0.739426	0.983458
ECs1868	1228.57	-0.309115	0.263615	-1.1726	0.240956	0.916847
ECs1869	509.687	-0.131428	0.273376	-0.480758	0.630689	0.980199
ECs1870	454.175	-0.163561	0.247892	-0.659807	0.509378	0.980199
ECs1871	991.289	-0.0566398	0.274742	-0.206157	0.836669	0.989762
ECs1872	40.7268	-0.0473756	0.321466	-0.147374	0.882837	0.993106
ECs1873	68.5763	0.721052	0.300117	2.40257	0.0162802	0.374691
ECs1874	3280.75	0.927081	0.297131	3.12011	0.00180786	0.10481
ECs1875	1580.25	0.928367	0.317218	2.92659	0.00342702	0.15388
ECs1876	1464.74	0.906634	0.308178	2.94192	0.00326185	0.150902
ECs1877	2358.18	0.436067	0.2798	1.5585	0.119116	0.807444
ECs1878	1987.48	0.383148	0.286673	1.33654	0.181374	0.856477
ECs1879	3619.49	0.370911	0.261115	1.42049	0.155465	0.844208
ECs1880	357.541	0.0859893	0.247508	0.34742	0.728276	0.983458
ECs1881	1388.31	-0.195949	0.254204	-0.770834	0.440805	0.980199
ECs1882	166.169	-0.16223	0.268057	-0.605206	0.545042	0.980199
ECs1883	251.563	0.0104236	0.259484	0.0401705	0.967957	0.999269
ECs1884	148.938	-0.114131	0.269916	-0.42284	0.672412	0.982639
ECs1885	1097.75	-0.311078	0.25661	-1.21226	0.225414	0.907747
ECs1890	1.98105	-0.0549807	0.19691	-0.279218	0.780077	NA
ECs1891	6.14238	0.0407536	0.319048	0.127735	0.898359	NA
ECs1892	15.872	0.328763	0.341277	0.963334	0.33538	NA
ECs1893	25.1596	-0.208533	0.333938	-0.624467	0.532321	0.980199
ECs1894	42.0504	0.0787561	0.320641	0.245621	0.805976	0.985586
ECs1895	59.2285	0.150604	0.310223	0.485469	0.627343	0.980199
ECs1896	2.40515	0.428637	0.235603	1.81932	0.0688627	NA
ECs1897	49.188	-0.0694458	0.30675	-0.226392	0.820897	0.988497
ECs1898	41.9759	-0.067122	0.326229	-0.205751	0.836985	0.989762
ECs1899	101.281	0.622366	0.303418	2.05119	0.0402489	0.565459
ECs1900	865.355	0.563491	0.242624	2.32249	0.0202068	0.407697
ECs1901	1027.99	0.435032	0.243318	1.78791	0.0737902	0.703533
ECs1902	2214.32	-0.152851	0.258473	-0.59136	0.55428	0.980199
ECs1903	6784.01	-0.0332363	0.244728	-0.135809	0.891972	0.993106
ECs1904	468.85	0.179839	0.248666	0.723213	0.469549	0.980199
ECs1905	218.999	0.12014	0.260619	0.460978	0.644814	0.980199
ECs1906	94.9339	-0.0230422	0.281019	-0.0819949	0.934651	0.999269
ECs1909	316.844	-0.163767	0.25207	-0.649689	0.515893	0.980199
ECs1910	160.751	0.282896	0.275329	1.02748	0.304193	0.970873
ECs1911	942.819	0.33572	0.286024	1.17375	0.240497	0.916847
ECs1912	1491.94	-0.0579978	0.237918	-0.243772	0.807408	0.985621
ECs1913	594.368	0.152131	0.261045	0.582777	0.560043	0.980199
ECs1914	16969.2	-0.206221	0.306304	-0.673256	0.500784	0.980199
ECs1915	2003.58	-0.178364	0.234636	-0.760174	0.447151	0.980199
ECs1916	66.0117	0.149768	0.297964	0.502638	0.615219	0.980199
ECs1917	38.7461	-0.0259615	0.330227	-0.078617	0.937337	0.999269
ECs1918	386.68	-0.0490919	0.254916	-0.192581	0.847287	0.990306
ECs1919	140.279	-0.141077	0.271343	-0.519922	0.603118	0.980199
ECs1920	169.459	-0.407496	0.264749	-1.53918	0.12376	0.807444
ECs1921	673.444	-0.578021	0.276335	-2.09174	0.0364618	0.54529
ECs1922	454.957	-0.311302	0.312177	-0.997199	0.318668	0.97778
ECs1923	126.518	0.497104	0.307315	1.61757	0.105755	0.790956
ECs1924	292.818	-0.0728449	0.268986	-0.270813	0.786535	0.985586
ECs1925	745.757	0.601894	0.251874	2.38966	0.0168638	0.379032
ECs1926	1276.28	-0.178529	0.261094	-0.683773	0.494119	0.980199
ECs1927	1385.34	0.134583	0.24036	0.559921	0.575533	0.980199
ECs1928	185.103	0.382946	0.283274	1.35186	0.176422	0.85464
ECs1929	61.1349	0.0597477	0.297456	0.200862	0.840806	0.989814
ECs1930	1.06999	0.204285	0.173985	1.17416	0.240333	NA
ECs1931	1.60231	-0.257441	0.212351	-1.21233	0.225384	NA
ECs1932	2.15114	-0.141831	0.231663	-0.612228	0.540387	NA
ECs1933	63.1045	-0.35411	0.313427	-1.1298	0.25856	0.932168
ECs1934	47.6973	-0.100094	0.314973	-0.317786	0.750647	0.983458
ECs1935	3.42345	-0.119569	0.277833	-0.430363	0.666932	NA
ECs1936	0.969425	-0.117638	0.179853	-0.654082	0.513059	NA
ECs1937	14.7798	-0.240663	0.341777	-0.704153	0.481337	NA
ECs1939	7.08561	-0.196184	0.319785	-0.613486	0.539555	NA
ECs1940	11.9387	-0.206838	0.325981	-0.634508	0.525749	NA
ECs1941	674.965	-0.472649	0.268699	-1.75903	0.0785728	0.714014
ECs1942	12.3309	-0.234139	0.340549	-0.687533	0.491747	NA
ECs1943	12.1644	0.414433	0.341427	1.21383	0.224813	NA
ECs1944	54.5318	-0.169067	0.312262	-0.541426	0.588214	0.980199
ECs1945	47.2949	-0.251424	0.311738	-0.806524	0.419941	0.980199
ECs1946	78.1139	-0.0814208	0.287781	-0.282926	0.777234	0.985081
ECs1948	25.7838	-0.186115	0.331212	-0.561922	0.574169	0.980199
ECs1949	14.397	-0.352341	0.34187	-1.03063	0.302716	NA
ECs1950	1.87245	0.0761798	0.236762	0.321757	0.747637	NA
ECs1951	7.13119	0.266037	0.330338	0.805347	0.420619	NA
ECs1952	1.41126	0.0827089	0.205816	0.401858	0.687789	NA
ECs1953	345.795	0.460304	0.25699	1.79114	0.0732713	0.703533
ECs1954	468.507	0.12782	0.284031	0.450021	0.652695	0.980199
ECs1955	1469.7	0.240542	0.277088	0.868107	0.385336	0.980199
ECs1956	27.7773	0.0851557	0.332086	0.256427	0.797621	0.985586
ECs1957	22.7723	-0.180874	0.336046	-0.538241	0.59041	0.980199
ECs1958	58.8317	0.066916	0.306655	0.218212	0.827264	0.9891
ECs1959	58.4657	-0.297966	0.311672	-0.956023	0.339061	0.980199
ECs1960	27.1222	-0.0647934	0.328396	-0.197303	0.843591	0.990306
ECs1961	273.91	-0.187016	0.256931	-0.727884	0.466684	0.980199
ECs1962	26.6043	-0.151633	0.329875	-0.459668	0.645754	0.980199
ECs1963	40.6185	0.0266099	0.314764	0.0845392	0.932628	0.999269
ECs1964	18.4691	-0.0904476	0.339976	-0.266041	0.790208	NA
ECs1965	27.6182	-0.0550022	0.330201	-0.166572	0.867707	0.993106
ECs1966	87.5943	-0.152661	0.29543	-0.516741	0.605337	0.980199
ECs1967	16.8132	-0.432701	0.341367	-1.26755	0.204958	NA
ECs1968	40.2509	0.216009	0.319776	0.675499	0.499359	0.980199
ECs1970	51.9419	0.0513518	0.303723	0.169074	0.865738	0.993106
ECs1971	123.765	-0.0410505	0.273819	-0.149918	0.880829	0.993106
ECs1972	212.419	-0.160551	0.267218	-0.600823	0.547958	0.980199
ECs1974	172.369	-0.0401925	0.263367	-0.15261	0.878706	0.993106
ECs1975	240.937	-0.282902	0.265652	-1.06493	0.286906	0.958175
ECs1976	77.1223	-0.347039	0.300244	-1.15586	0.24774	0.918745
ECs1977	75.1575	-0.207278	0.295603	-0.701205	0.483175	0.980199
ECs1978	114.839	-0.345576	0.283222	-1.22016	0.222405	0.900631
ECs1979	56.3938	-0.229608	0.304468	-0.754128	0.450772	0.980199
ECs1980	114.204	-0.215919	0.283413	-0.761853	0.446147	0.980199
ECs1981	49.1834	-0.262011	0.313841	-0.834851	0.403802	0.980199
ECs1982	18.0618	0.0220511	0.339821	0.0648904	0.948261	NA
ECs1983	211.669	-0.0834109	0.261719	-0.318704	0.749951	0.983458
ECs1984	33.1818	-0.232739	0.322969	-0.720624	0.471141	0.980199
ECs1985	66.4077	-0.288246	0.297561	-0.968694	0.332698	0.980199
ECs1986	55.953	0.0393364	0.302641	0.129977	0.896585	0.993106
ECs1987	89.0847	-0.115691	0.290016	-0.398911	0.689959	0.982645
ECs1988	33.1814	0.362678	0.325965	1.11263	0.265868	0.941018
ECs1989	626.092	-0.0639701	0.247366	-0.258605	0.79594	0.985586
ECs1990	264.445	-0.24578	0.260492	-0.943523	0.345414	0.980199
ECs1991	119.378	-0.32453	0.278727	-1.16433	0.244291	0.918745
ECs1992	50.9684	-0.320175	0.318222	-1.00614	0.314348	0.976206
ECs1993	52.0016	-0.285691	0.311551	-0.916996	0.359145	0.980199
ECs1994	321.859	-0.0233638	0.261207	-0.0894456	0.928728	0.999269
ECs1995	212.606	0.00581277	0.291442	0.0199448	0.984087	0.999269
ECs1996	205.54	-0.0870497	0.270884	-0.321354	0.747942	0.983458
ECs1997	10938.5	-0.50375	0.268703	-1.87475	0.0608276	0.658606
ECs2000	6933.59	-0.145554	0.275176	-0.52895	0.59684	0.980199
ECs2001	167.663	-0.194136	0.288091	-0.67387	0.500394	0.980199
ECs2002	1518.42	-0.318937	0.235989	-1.35149	0.176537	0.85464
ECs2003	1023.44	-0.0590021	0.256134	-0.230356	0.817815	0.987079
ECs2004	120.306	-0.106679	0.278987	-0.382378	0.702181	0.983002
ECs2005	90.9247	-0.140662	0.297604	-0.472647	0.636465	0.980199
ECs2006	343.138	-0.236983	0.263664	-0.898806	0.368756	0.980199
ECs2007	169.981	-0.112924	0.26308	-0.429237	0.667751	0.98052
ECs2008	1043.38	0.103931	0.238146	0.436416	0.662535	0.980199
ECs2009	394.304	0.142121	0.268555	0.529206	0.596662	0.980199
ECs2010	2.72164	-0.154218	0.27011	-0.570947	0.568036	NA
ECs2011	1.17601	-0.170357	0.177637	-0.959016	0.337551	NA
ECs2012	40.159	-0.0816604	0.32461	-0.251565	0.801378	0.985586
ECs2013	67.8806	-0.198092	0.298332	-0.663999	0.506691	0.980199
ECs2014	140.181	0.0192577	0.278495	0.0691492	0.944871	0.999269
ECs2015	2223.39	-0.14713	0.242526	-0.606654	0.54408	0.980199
ECs2016	2.57693	-0.228508	0.240839	-0.9488	0.342722	NA
ECs2017	2.21264	-0.0576332	0.230027	-0.25055	0.802162	NA
ECs2018	0.829065	0.00462682	0.153645	0.0301137	0.975976	NA
ECs2019	2.37589	0.172946	0.25255	0.684801	0.49347	NA
ECs2020	582.079	0.029429	0.251015	0.11724	0.90667	0.993106
ECs2021	6498.38	0.0597207	0.250433	0.238469	0.811517	0.986053
ECs2022	15632.6	-0.278048	0.283821	-0.979661	0.327253	0.980199
ECs2023	382.528	0.265033	0.304031	0.871733	0.383354	0.980199
ECs2024	218.451	-0.314617	0.296318	-1.06175	0.288347	0.958175
ECs2025	2170.94	-0.182901	0.262661	-0.696337	0.486218	0.980199
ECs2026	147.355	0.0319334	0.288066	0.110855	0.911732	0.994327
ECs2027	596.971	0.917412	0.320323	2.86403	0.00418294	0.167199
ECs2028	1389.31	0.418969	0.24091	1.73911	0.0820153	0.726819
ECs2029	1267.81	0.469582	0.303467	1.54739	0.121769	0.807444
ECs2030	0.585778	-0.0661643	0.122878	-0.538457	0.590262	NA
ECs2031	2684.08	-0.255182	0.271827	-0.938766	0.347851	0.980199
ECs2032	199.892	-0.0703963	0.264209	-0.266442	0.789899	0.985586
ECs2033	1925.71	-0.193718	0.278988	-0.694359	0.487457	0.980199
ECs2034	185.52	0.123365	0.261278	0.472162	0.636811	0.980199
ECs2035	274.395	0.134846	0.25956	0.519517	0.6034	0.980199
ECs2036	3897.98	0.306009	0.238467	1.28323	0.199411	0.872107
ECs2037	80.9439	-0.0893609	0.289461	-0.308715	0.757538	0.983458
ECs2038	68.3473	0.133597	0.294376	0.45383	0.649951	0.980199
ECs2039	593.116	0.252375	0.287766	0.877017	0.380478	0.980199
ECs2040	35.9152	-0.0709455	0.318272	-0.222908	0.823607	0.988957
ECs2041	0.411477	0.040484	0.111846	0.361963	0.717379	NA
ECs2042	128.039	-0.143799	0.277697	-0.517829	0.604578	0.980199
ECs2043	214.677	0.259855	0.268027	0.969508	0.332292	0.980199
ECs2044	3582.8	-0.0465453	0.23902	-0.194734	0.845601	0.990306
ECs2045	1080.07	-0.0160895	0.244394	-0.0658345	0.94751	0.999269
ECs2046	742.188	-0.08733	0.240374	-0.363309	0.716374	0.983458
ECs2047	1629.34	-0.457698	0.244717	-1.87032	0.0614395	0.662101
ECs2048	4538.74	-0.642826	0.244812	-2.6258	0.00864466	0.263172
ECs2049	19.8391	-0.375286	0.341924	-1.09757	0.272392	NA
ECs2050	523.049	-0.115451	0.253197	-0.455974	0.648409	0.980199
ECs2051	61.4677	0.0627712	0.296697	0.211567	0.832445	0.989257
ECs2052	184.074	-0.325254	0.275146	-1.18211	0.23716	0.914863
ECs2053	1660.46	-0.735531	0.265125	-2.77428	0.00553241	0.196422
ECs2054	495.314	0.429468	0.26319	1.63178	0.102726	0.785857
ECs2055	446.621	0.487413	0.306594	1.58977	0.111887	0.799218
ECs2056	632.316	0.678249	0.308451	2.19889	0.0278858	0.48623
ECs2057	72.1062	0.383248	0.312004	1.22834	0.219319	0.897783
ECs2058	28.4077	0.321975	0.334566	0.962364	0.335867	0.980199
ECs2059	0	NA	NA	NA	NA	NA
ECs2060	30.8191	-0.266106	0.324438	-0.820205	0.412099	0.980199
ECs2061	257.503	-0.171078	0.25875	-0.661172	0.508502	0.980199
ECs2064	379.884	0.123139	0.248116	0.496295	0.619686	0.980199
ECs2065	235.334	-0.220701	0.281814	-0.783146	0.433542	0.980199
ECs2066	170.315	0.653694	0.271755	2.40545	0.0161524	0.374691
ECs2067	395.078	0.123026	0.24629	0.499515	0.617417	0.980199
ECs2068	908.129	-0.159752	0.316804	-0.50426	0.614078	0.980199
ECs2069	819.038	-0.160356	0.313591	-0.511354	0.609103	0.980199
ECs2070	1855.48	-0.277148	0.307214	-0.902134	0.366986	0.980199
ECs2071	3433.58	-0.161573	0.299526	-0.539428	0.589591	0.980199
ECs2072	1301.36	-0.0589396	0.296037	-0.199095	0.842188	0.989814
ECs2073	9.30751	0.352162	0.334985	1.05128	0.293131	NA
ECs2074	0.187619	0.0317559	0.111735	0.284207	0.776252	NA
ECs2075	0	NA	NA	NA	NA	NA
ECs2076	48.1536	1.15561	0.311869	3.70542	0.000211039	0.0193312
ECs2077	54.2665	0.420904	0.30922	1.36118	0.173456	0.853834
ECs2078	842.452	0.258736	0.333415	0.776018	0.437738	0.980199
ECs2079	267.928	0.397112	0.339144	1.17092	0.24163	0.917551
ECs2080	249.472	0.521183	0.338433	1.53999	0.123563	0.807444
ECs2081	238.522	-0.0689479	0.260406	-0.264771	0.791186	0.985586
ECs2082	7182.42	-0.252228	0.256787	-0.982247	0.325978	0.980199
ECs2083	6901	1.25932	0.290064	4.34152	1.41498e-05	0.00202519
ECs2084	41056.3	-0.072895	0.280022	-0.260318	0.794618	0.985586
ECs2085	65.7761	-0.121079	0.302213	-0.400641	0.688684	0.982645
ECs2086	17363.1	-0.279511	0.282715	-0.988668	0.322826	0.980199
ECs2087	128.566	0.213584	0.292225	0.730887	0.464848	0.980199
ECs2088	139.268	0.00443975	0.281857	0.0157518	0.987432	0.999269
ECs2089	75.975	0.365852	0.307239	1.19077	0.233742	0.914863
ECs2090	52.6116	0.116227	0.307344	0.378167	0.705307	0.983309
ECs2091	847.907	0.211717	0.264607	0.800119	0.423642	0.980199
ECs2092	93.2575	0.386317	0.312493	1.23624	0.216368	0.896709
ECs2095	923.508	0.00259564	0.248938	0.0104268	0.991681	0.999269
ECs2096	680.405	-0.0256237	0.243674	-0.105156	0.916252	0.996778
ECs2097	204297	-0.440894	0.280686	-1.57077	0.116236	0.807444
ECs2098	222704	-0.259373	0.26719	-0.970742	0.331677	0.980199
ECs2099	93.7465	0.340873	0.298396	1.14235	0.253309	0.92689
ECs2100	41.7845	0.802034	0.335576	2.39002	0.0168475	0.379032
ECs2101	7.91388	0.341383	0.306859	1.11251	0.265919	NA
ECs2102	103.74	-0.279371	0.281519	-0.992371	0.321017	0.980199
ECs2103	3382.96	-0.694387	0.245271	-2.83111	0.00463872	0.177865
ECs2104	15.2084	0.0162936	0.341369	0.0477303	0.961931	NA
ECs2105	0.622584	-0.0830785	0.113067	-0.734771	0.462479	NA
ECs2106	483.357	1.74575	0.26272	6.64491	3.034e-11	1.38957e-08
ECs2107	290.549	2.12901	0.316691	6.72268	1.7841e-11	1.16731e-08
ECs2108	170.332	2.08724	0.28801	7.2471	4.25774e-13	3.90009e-10
ECs2109	293.424	1.79387	0.256666	6.98914	2.76568e-12	2.11113e-09
ECs2110	1049.08	2.07991	0.260125	7.9958	1.28733e-15	5.49102e-12
ECs2112	962.793	2.07067	0.310878	6.66072	2.72482e-11	1.38663e-08
ECs2113	9372.2	1.91291	0.241565	7.91882	2.39783e-15	5.49102e-12
ECs2115	13.8633	-0.188149	0.341764	-0.550523	0.581961	NA
ECs2116	184.269	0.110246	0.267934	0.411467	0.68073	0.982645
ECs2117	273.375	-0.159649	0.260559	-0.612718	0.540063	0.980199
ECs2118	2877.08	-0.350022	0.257876	-1.35733	0.174677	0.854378
ECs2119	1391.16	0.156993	0.240093	0.653885	0.513186	0.980199
ECs2120	2942.32	0.174683	0.243195	0.718284	0.472582	0.980199
ECs2121	1517.19	-0.212003	0.251001	-0.844631	0.398317	0.980199
ECs2122	1914.33	-0.365655	0.278585	-1.31254	0.189336	0.861392
ECs2123	8363.63	-0.294427	0.270938	-1.0867	0.277171	0.95232
ECs2124	9514.74	-0.3837	0.27261	-1.40751	0.159277	0.844208
ECs2125	3217.15	-0.464601	0.285993	-1.62452	0.104265	0.789945
ECs2126	1770.65	-0.284347	0.260753	-1.09048	0.2755	0.950206
ECs2127	55.9063	-0.410843	0.309628	-1.32689	0.184544	0.856477
ECs2128	893.895	-0.405045	0.259881	-1.55858	0.119096	0.807444
ECs2129	305.738	0.435874	0.271814	1.60357	0.108808	0.793241
[truncated: 3,434 more rows]

## Sheet: Up-regulated
Locus Tag	Gene Name	Base Mean	log2 Fold change	lfcSE	stat	P value	Padj	Gene product
ECs2107	fimH_2	290.55	2.13	0.317	6.72	1.78e-11	1.17e-08	adhesin
ECs2108	fimG	170.33	2.09	0.288	7.25	4.26e-13	3.9e-10	fimbrial-like protein
ECs2110	ydeT	1049.08	2.08	0.26	8	1.29e-15	5.49e-12	outer membrane protein
ECs2112	fimC	962.79	2.07	0.311	6.66	2.72e-11	1.39e-08	fimbrial chaperone protein
ECs2712	yodB	1604.44	1.98	0.252	7.86	3.74e-15	5.71e-12	cytochrome
ECs2113	fmlA	9372.2	1.91	0.242	7.92	2.4e-15	5.49e-12	type 1 fimbrial protein
ECs3929	ribB	9762.87	1.87	0.241	7.76	8.75e-15	1e-11	3,4-dihydroxy-2-butanone-4-phosphate synthase
ECs3097	napF	569.87	1.84	0.336	5.48	4.26e-08	1.03e-05	ferredoxin-type protein
ECs2109	fimF_1	293.42	1.79	0.257	6.99	2.77e-12	2.11e-09	fimbrial-like protein
ECs0921	ybjG	545.78	1.75	0.262	6.68	2.36e-11	1.35e-08	undecaprenyl pyrophosphate phosphatase
ECs2106	ydeP	483.36	1.75	0.263	6.64	3.03e-11	1.39e-08	oxidoreductase
ECs2713		461.04	1.7	0.258	6.57	5.15e-11	2.15e-08	hypothetical protein
ECs5219	mgtA	2603.15	1.64	0.281	5.83	5.65e-09	1.62e-06	magnesium-transporting ATPase MgtA
ECs2314	rstA	1452.15	1.61	0.247	6.53	6.38e-11	2.44e-08	DNA-binding transcriptional regulator RstA
ECs1343	terW	558.01	1.59	0.264	6.03	1.66e-09	5.42e-07	TerW protein
ECs2303	asr	609.19	1.56	0.258	6.05	1.48e-09	5.2e-07	acid-shock protein
ECs2315	rstB	2771.22	1.53	0.279	5.49	4.07e-08	1.03e-05	sensor protein RstB
ECs2535	yebO	956.17	1.49	0.283	5.24	1.62e-07	2.96e-05	hypothetical protein
ECs2536	mgrB	617.27	1.48	0.283	5.24	1.59e-07	2.96e-05	hypothetical protein
ECs5327	fhuF	165.31	1.48	0.34	4.34	1.39e-05	0.00203	ferric hydroximate transport ferric iron reductase
ECs3096	napD	160.9	1.43	0.339	4.22	2.49e-05	0.00317	assembly protein for periplasmic nitrate reductase
ECs4834	sodA	5656.38	1.38	0.337	4.09	4.32e-05	0.00508	superoxide dismutase
ECs1601	phoQ	2963.55	1.32	0.242	5.46	4.67e-08	1.07e-05	sensor protein PhoQ
ECs0158	hemL	5469.09	1.29	0.246	5.25	1.48e-07	2.96e-05	glutamate-1-semialdehyde aminotransferase
ECs2083	maeA	6901	1.26	0.29	4.34	1.41e-05	0.00203	malate dehydrogenase
ECs0855	bioC	389.83	1.24	0.308	4.04	5.41e-05	0.00605	biotin biosynthesis protein BioC
ECs1265	efeB	314.95	1.23	0.334	3.69	0.000226	0.0203	hypothetical protein
ECs0854	bioF	666.68	1.23	0.32	3.85	0.00012	0.0119	8-amino-7-oxononanoate synthase
ECs0426	ampH	771.57	1.22	0.295	4.14	3.43e-05	0.00421	beta-lactam binding protein AmpH
ECs4894	fabR	1870.45	1.21	0.253	4.79	1.63e-06	0.000288	DNA-binding transcriptional repressor FabR
ECs4895	yijD	900.83	1.18	0.268	4.42	1.01e-05	0.00154	hypothetical protein
ECs0853	bioB	827.69	1.17	0.323	3.64	0.000276	0.0222	biotin synthase
ECs3066	lpxT	123.96	1.17	0.29	4.04	5.28e-05	0.00604	hypothetical protein
ECs2076		48.15	1.16	0.312	3.71	0.000211	0.0193	outer membrane porin protein
ECs2506	yeaR	132.29	1.15	0.313	3.65	0.000258	0.0222	hypothetical protein
ECs4769	tatD	375.97	1.14	0.275	4.14	3.49e-05	0.00421	DNase TatD
ECs5096	eptA	1003.45	1.13	0.264	4.3	1.73e-05	0.00241	cell division protein
ECs0852	bioA	382.42	1.13	0.317	3.57	0.000356	0.0272	adenosylmethionine-8-amino-7-oxononanoate aminotransferase BioA
ECs3952	yqjH	65.29	1.1	0.323	3.4	0.000667	0.0466	hypothetical protein
ECs1344		828.82	1.1	0.26	4.24	2.26e-05	0.00304	hypothetical protein
ECs3141	arnB	1552.72	1.07	0.277	3.87	0.000108	0.011	UDP-4-amino-4-deoxy-L-arabinose-oxoglutarate aminotransferase
ECs1602	phoP	4148.57	1.04	0.233	4.48	7.42e-06	0.00117	PhoP family transcriptional regulator
ECs0920	deoR	528.11	0.99	0.283	3.51	0.000454	0.0335	DeoR family transcriptional regulator
ECs0385	prpB	1794.07	0.96	0.284	3.38	0.000733	0.0499	2-methylisocitrate lyase
ECs5094	pmrB	1054.13	0.95	0.247	3.83	0.000129	0.0126	sensor protein BasS/PmrB
ECs2307	tqsA	433.4	0.95	0.259	3.65	0.000266	0.0222	transporter
ECs3773	bglA	2137.13	0.91	0.249	3.64	0.000269	0.0222	6-phospho-beta-glucosidase A
ECs0526	htpG	12429.8	0.81	0.237	3.4	0.000672	0.0466	heat shock protein 90

## Sheet: Down-regulated
Locus Tag	Gene Name	Base Mean	log2 Fold Change	lfcSE	stat	P value	Padj	Gene product
ECs3956	ygjH	159.75	-1.74	0.304	-5.71	1.13e-08	3.04e-06	hypothetical protein
ECs3566	norV	161.7	-1.63	0.31	-5.25	1.51e-07	2.96e-05	anaerobic nitric oxide reductase flavorubredoxin
ECs5105	dcuB	582.75	-1.55	0.295	-5.25	1.52e-07	2.96e-05	anaerobic C4-dicarboxylate transporter
ECs3958	ebgA	215.86	-1.53	0.259	-5.9	3.57e-09	1.09e-06	beta-galactosidase
ECs1756	ompW	18393.7	-1.46	0.32	-4.56	5.17e-06	0.000877	outer membrane protein W
ECs5104	fumB	886.45	-1.35	0.3	-4.49	7.01e-06	0.00115	fumarase B
ECs2294	ynfF_3	1903.47	-1.25	0.329	-3.79	0.000153	0.0143	oxidoreductase major subunit
ECs2295	ynfG	515.5	-1.23	0.337	-3.64	0.000272	0.0222	oxidoreductase Fe-S subunit
ECs2296	ynfH_1	607.66	-1.21	0.302	-4.01	6.07e-05	0.00662	Oxidoreductase membrane subunit
ECs3960	ygjI	80.83	-1.14	0.318	-3.6	0.00032	0.0253	oxidoreductase
ECs3959	ebgC	39.25	-1.14	0.32	-3.57	0.000363	0.0272	cryptic beta-D-galactosidase subunit beta
ECs2293	ynfF_2	938.93	-1.13	0.335	-3.37	0.000742	0.0499	oxidoreductase major subunit
ECs5510		137543	-1.08	0.254	-4.23	2.32e-05	0.00304	inhibitor of CsrA
ECs2362	lhr	1261.54	-1	0.252	-3.95	7.79e-05	0.00829	ATP-dependent helicase Lhr
ECs5221	pyrI	661.67	-0.98	0.272	-3.58	0.000343	0.0266	aspartate carbamoyltransferase
ECs5222	pyrB	1160.4	-0.94	0.247	-3.81	0.00014	0.0133	aspartate carbamoyltransferase
ECs1353	terB	741.07	-0.94	0.243	-3.87	0.000108	0.011	Tellurium resistance protein TerB
ECs5134	frdB	9339.04	-0.87	0.254	-3.45	0.000569	0.0414	fumarate reductase iron-sulfur subunit
ECs0289	intS	433.56	-0.87	0.255	-3.43	0.000599	0.0429	integrase
ECs1351	terZ	1267.08	-0.87	0.24	-3.64	0.000269	0.0222	Tellurium resistance protein TerZ
